# Supplementary material
Source: publisher figshare collection journal article supplement (https://gsapubs.figshare.com/ndownloader/files/23763530)

## **SUPPLEMENTARY INFORMATION #3 - $^{40}\text{Ar}$ - $^{39}\text{Ar}$ GEOCHRONOLOGICAL DATA**

Summary table of the  $^{40}\text{Ar}$ - $^{39}\text{Ar}$  results, followed by relevant  $^{40}\text{Ar}$ - $^{39}\text{Ar}$  data for all the experiments. Figures with the age spectra,  $^{37}\text{Ar}_{\text{Ca}}/^{39}\text{Ar}_{\text{K}}$  diagram and the correlation  $^{36}\text{Ar}/^{40}\text{Ar}$  versus  $^{39}\text{Ar}/^{40}\text{Ar}$  plot for all the samples is presented next identifying in the age spectra with a horizontal arrow the segment used to calculate  $t_p$  and  $W_m$ . The atmospheric value is indicated in the  $^{36}\text{Ar}/^{40}\text{Ar}$  versus  $^{39}\text{Ar}/^{40}\text{Ar}$  plot with an arrow in the Y-axis. In the tables and figures  $t_c$ ,  $(^{40}\text{Ar}/^{36}\text{Ar})_i$ , MSWD and the number of data points included to determine the straight line are given. The preferred age is identified in bold typeface in the tables and the figures.

Santa Rosalía North

| Sample   | min | t <sub>p</sub> or (W <sub>m</sub> ) Ma | % <sup>39</sup> Ar | MSWD / n  | t <sub>c</sub> Ma   | ( <sup>40</sup> Ar/ <sup>36</sup> Ar) <sub>i</sub> | MSWD / n | Rock Type                                                            | Lat N     | Long W     |
|----------|-----|----------------------------------------|--------------------|-----------|---------------------|----------------------------------------------------|----------|----------------------------------------------------------------------|-----------|------------|
| SR 08-6  | gms | <b>13.08 ± 0.11</b>                    | 75.34              | 0.9 / 8   | 13.03 ± 0.36        | 308 ± 37                                           | 0.4 / 7  | Basaltic trachyandesite lava dome (coherent interior)                | 27.33322  | 112.345201 |
| SR 09-1  | gms | <b>13.21 ± 0.21</b>                    | 87.96              | 1.0 / 8   | 13.24 ± 0.33        | 290 ± 6                                            | 1.7 / 15 | Basaltic andesite lava / lava dome from West Curuglu area            | 27.340178 | 112.342491 |
| SR 12-4  | gms | 13.90 ± 0.08                           | 85.45              | 0.9 / 7   | <b>13.81 ± 0.10</b> | 331 ± 21                                           | 0.6 / 8  | Trachyandesite peperite / lava dome complex of Mina Victoria         | 27.34762  | 112.340263 |
| SR 12-2† | plg | <b>10.08 ± 0.92</b>                    | 100                | 0.8 / 5   | 12.6 ± 1.6          | 287 ± 15                                           | 1.0 / 10 | Basaltic andesite lava of Mina Victoria (coherent interior)          | 27.348089 | 112.3367   |
|          | gms | (12.12 ± 0.51)                         | 24.82              | < 0.1 / 3 |                     |                                                    |          |                                                                      |           |            |
| SR 08-4  | gms | 11.50 ± 0.18                           | 84.36              | 0.7 / 7   | <b>10.83 ± 0.95</b> | 314 ± 18                                           | 1.2 / 13 | Basaltic andesite lava (block from basal flow breccia)               | 27.336636 | 112.337418 |
| SR 15-8  | gms | 9.75 ± 0.14                            | 76.6               | 0.2 / 5   | <b>9.69 ± 0.12</b>  | 291 ± 6                                            | 1.0 / 14 | Basaltic trachyandesite lava, interstratified with the El Morro Tuff | 27.321388 | 112.24194  |
| SR 14-1  | wr  | <b>9.66 ± 0.21</b>                     | 73.41              | 0.5 / 6   | 9.71 ± 0.34         | 302 ± 15                                           | 0.5 / 11 | Upper basaltic andesite lava of Cerro Juanita (coherent interior)    | 27.314722 | 112.299444 |
| SR 14-5  | wr  | <b>8.84 ± 0.16</b>                     | 87.27              | 0.4 / 7   | 9.10 ± 0.39         | 288 ± 10                                           | 0.4 / 7  | Upper andesite lava of Cerro Montado (block from flow breccia)       | 27.301388 | 112.2825   |

Santa Rosalía South

| Sample   | min | t <sub>p</sub> or (W <sub>m</sub> ) Ma | % <sup>39</sup> Ar | MSWD / n | t <sub>c</sub> Ma   | ( <sup>40</sup> Ar/ <sup>36</sup> Ar) <sub>i</sub> | MSWD / n | Rock Type                                                       | Lat N     | Long W     |
|----------|-----|----------------------------------------|--------------------|----------|---------------------|----------------------------------------------------|----------|-----------------------------------------------------------------|-----------|------------|
| SL 08-4  | gms | 10.48 ± 0.09                           | 85.03              | 0.6 / 8  | <b>10.11 ± 0.14</b> | 336 ± 16                                           | 1.2 / 16 | Andesite pyroxene lava from Cerro San Lucas (coherent interior) | 27.192278 | 112.240444 |
| SL 08-1§ | gms | 5.92 ± 0.29                            | 36.51              | 0.4 / 3  | 6.01 ± 0.86         | 296 ± 13                                           | 1.8 / 8  | Trachyandesite hornblende intrusion of Cerro San Lucas          | 27.18728  | 112.245441 |
|          | hb  | <b>6.06 ± 0.27</b>                     | 74.02              | 0.2 / 2  |                     |                                                    |          |                                                                 |           |            |

All errors are 1σ; t<sub>p</sub> plateau age; W<sub>m</sub> weighted mean of 2 or more consecutive fractions; %<sup>39</sup>Ar percentage of <sup>39</sup>Ar released with the fractions selected for the plateau age (weighted mean); MSWD mean square of weighted deviates; n number of data fitted; t<sub>c</sub> inverse correlation diagram age; (<sup>40</sup>Ar/<sup>36</sup>Ar)<sub>i</sub> initial ratio of the sample; hb hornblende; plg plagioclase; gms groundmass; wr whole rock; preferred age is identified in bold typeface. † Isochron age contains data of plagioclase and groundmass; § Isochron age calculated with the combined fractions of hbde and gms

SR 08-6  
Basaltic trachyandesite lava dome (coherent interior)

Lat N      Long W  
27.33322   112.345201

Laser step-heating experiments with groundmass sample

| Pwr  | <sup>39</sup> Ar × 10 <sup>-6</sup> | % <sup>39</sup> Ar | <sup>40</sup> Ar*/ <sup>39</sup> Ar <sub>K</sub> | 1σ   | Age in Ma | 1σ   |   |   | % <sup>40</sup> Ar* | <sup>40</sup> Ar/ <sup>36</sup> Ar | <sup>37</sup> Ar <sub>Ca</sub> / <sup>39</sup> Ar <sub>K</sub> |
|------|-------------------------------------|--------------------|--------------------------------------------------|------|-----------|------|---|---|---------------------|------------------------------------|----------------------------------------------------------------|
| 0.5  | 30.055                              | 1.76               | -4.96                                            | 0.77 | -39.26    | 6.15 | a | ‡ | -11.42              | 265.22                             | 0.484                                                          |
| 1.2  | 68.937                              | 4.04               | 0.49                                             | 0.23 | 3.81      | 1.81 | b | ‡ | 5.39                | 312.32                             | 1.033                                                          |
| 1.8  | 123.875                             | 7.25               | 1.50                                             | 0.07 | 11.72     | 0.53 | c | ‡ | 41.73               | 507.10                             | 1.513                                                          |
| 2.2  | 106.170                             | 6.21               | 1.73                                             | 0.06 | 13.48     | 0.43 | d |   | 72.99               | 1094.18                            | 1.594                                                          |
| 2.6  | 129.674                             | 7.59               | 1.73                                             | 0.05 | 13.49     | 0.41 | e |   | 84.95               | 1963.87                            | 1.615                                                          |
| 3.2  | 198.311                             | 11.61              | 1.68                                             | 0.04 | 13.09     | 0.30 | f |   | 81.41               | 1589.71                            | 1.483                                                          |
| 3.6  | 154.617                             | 9.05               | 1.60                                             | 0.04 | 12.45     | 0.31 | g | ‡ | 87.95               | 2452.19                            | 1.414                                                          |
| 4.5  | 214.755                             | 12.57              | 1.70                                             | 0.03 | 13.25     | 0.25 | h |   | 89.11               | 2712.79                            | 1.267                                                          |
| 5.5  | 186.098                             | 10.89              | 1.66                                             | 0.03 | 12.98     | 0.22 | i |   | 83.81               | 1825.12                            | 1.176                                                          |
| 6.5  | 170.026                             | 9.95               | 1.67                                             | 0.04 | 13.06     | 0.31 | j |   | 81.37               | 1586.28                            | 1.175                                                          |
| 8.0  | 127.664                             | 7.47               | 1.67                                             | 0.06 | 13.03     | 0.47 | k |   | 72.70               | 1082.27                            | 1.507                                                          |
| 12.0 | 198.802                             | 11.61              | 1.37                                             | 0.10 | 10.73     | 0.75 | l | ‡ | 37.14               | 470.12                             | 4.347                                                          |

Integrated results

| <sup>39</sup> Ar × 10 <sup>-6</sup> | <sup>40</sup> Ar*/ <sup>39</sup> Ar <sub>K</sub> | 1σ   | Age in Ma | 1σ   | % <sup>40</sup> Ar* | <sup>40</sup> Ar/ <sup>36</sup> Ar | <sup>37</sup> Ar <sub>Ca</sub> / <sup>39</sup> Ar <sub>K</sub> |
|-------------------------------------|--------------------------------------------------|------|-----------|------|---------------------|------------------------------------|----------------------------------------------------------------|
| 1709.0                              | 1.46                                             | 0.03 | 11.43     | 0.22 | 43.63               | 524.17                             | 1.70                                                           |

CIC 93 RO J = 0.004341 ± 0.000008

Preferred age t<sub>p</sub> = 13.08 ± 0.11 Ma

Weighted mean of groundmass fractions d to k, representing 75.34% of <sup>39</sup>Ar released in 8 consecutive fractions, MSWD = 0.9

t<sub>c</sub> = 13.03 ± 0.36 Ma; (<sup>40</sup>Ar/<sup>36</sup>Ar)<sub>i</sub> = 308 ± 37, MSWD = 0.4 for n = 7

‡ fraction ignored in the isochron given in the figure

SR 09-1  
Basaltic andesite lava / lava dome from West Curuglu area

Lat N      Long W  
27.340178   112.342491

Laser step-heating experiments with groundmass sample

| Pwr  | <sup>39</sup> Ar × 10 <sup>-6</sup> | % <sup>39</sup> Ar | <sup>40</sup> Ar*/ <sup>39</sup> Ar <sub>K</sub> | 1σ   | Age in Ma | 1σ   |   |   | % <sup>40</sup> Ar* | <sup>40</sup> Ar/ <sup>36</sup> Ar | <sup>37</sup> Ar <sub>Ca</sub> / <sup>39</sup> Ar <sub>K</sub> |
|------|-------------------------------------|--------------------|--------------------------------------------------|------|-----------|------|---|---|---------------------|------------------------------------|----------------------------------------------------------------|
| 0.6  | 145.483                             | 11.20              | 1.00                                             | 0.10 | 7.81      | 0.79 | a | ‡ | 21.42               | 376.05                             | 5.710                                                          |
| 1.2  | 127.678                             | 9.86               | 0.93                                             | 0.10 | 7.26      | 0.82 | b | ‡ | 9.25                | 325.61                             | 0.882                                                          |
| 1.9  | 156.751                             | 12.10              | 1.62                                             | 0.08 | 12.67     | 0.64 | c |   | 32.58               | 438.26                             | 1.359                                                          |
| 2.6  | 193.148                             | 14.91              | 1.73                                             | 0.06 | 13.47     | 0.50 | d |   | 52.57               | 622.98                             | 1.677                                                          |
| 3.6  | 259.334                             | 20.02              | 1.65                                             | 0.05 | 12.91     | 0.39 | e |   | 56.31               | 676.35                             | 1.514                                                          |
| 5.0  | 170.644                             | 13.17              | 1.62                                             | 0.07 | 12.67     | 0.56 | f |   | 60.78               | 753.54                             | 1.645                                                          |
| 7.0  | 120.794                             | 9.32               | 1.72                                             | 0.07 | 13.43     | 0.54 | g |   | 57.72               | 698.96                             | 2.672                                                          |
| 9.0  | 122.468                             | 9.42               | 1.41                                             | 0.08 | 11.01     | 0.60 | h |   | 32.44               | 437.41                             | 7.166                                                          |
| 0.4  | 51.165                              | 4.30               | 1.99                                             | 0.37 | 15.48     | 2.84 | i |   | 10.65               | 330.71                             | 0.381                                                          |
| 1.0  | 91.882                              | 7.73               | 0.79                                             | 0.21 | 6.21      | 1.61 | j | ‡ | 5.73                | 313.46                             | 0.638                                                          |
| 1.5  | 105.179                             | 8.84               | 1.66                                             | 0.12 | 12.97     | 0.97 | k |   | 21.59               | 376.85                             | 1.174                                                          |
| 2.0  | 142.699                             | 12.00              | 1.52                                             | 0.10 | 11.87     | 0.79 | l |   | 32.74               | 439.33                             | 1.434                                                          |
| 2.5  | 138.407                             | 11.63              | 1.70                                             | 0.08 | 13.26     | 0.60 | m |   | 48.63               | 575.20                             | 1.577                                                          |
| 3.0  | 133.577                             | 11.23              | 1.72                                             | 0.06 | 13.39     | 0.50 | n |   | 53.79               | 639.43                             | 1.618                                                          |
| 4.0  | 137.800                             | 11.58              | 1.79                                             | 0.06 | 13.96     | 0.46 | o |   | 59.61               | 731.58                             | 1.591                                                          |
| 6.0  | 215.892                             | 18.14              | 1.66                                             | 0.05 | 12.99     | 0.37 | p |   | 59.58               | 731.07                             | 1.990                                                          |
| 8.0  | 105.610                             | 8.86               | 1.69                                             | 0.10 | 13.22     | 0.78 | q |   | 46.65               | 553.85                             | 3.986                                                          |
| 10.0 | 67.896                              | 5.68               | 1.57                                             | 0.18 | 12.27     | 1.37 | r |   | 32.02               | 434.71                             | 8.913                                                          |

Integrated results

| <sup>39</sup> Ar × 10 <sup>-6</sup> | <sup>40</sup> Ar*/ <sup>39</sup> Ar <sub>K</sub> | 1σ   | Age in Ma | 1σ   | % <sup>40</sup> Ar* | <sup>40</sup> Ar/ <sup>36</sup> Ar | <sup>37</sup> Ar <sub>Ca</sub> / <sup>39</sup> Ar <sub>K</sub> |
|-------------------------------------|--------------------------------------------------|------|-----------|------|---------------------|------------------------------------|----------------------------------------------------------------|
| 1296.0                              | 1.50                                             | 0.03 | 11.68     | 0.27 | 35.33               | 456.95                             | 2.59                                                           |
| 1190.0                              | 1.62                                             | 0.05 | 12.61     | 0.35 | 30.29               | 423.93                             | 2.11                                                           |

CIC 93 RO J = 0.004341 ± 0.000008

Preferred age t<sub>p</sub> = 13.21 ± 0.21 Ma

Weighted mean of fractions k to r, representing 87.96% of <sup>39</sup>Ar released in 8 consecutive fractions, MSWD = 1.0

t<sub>c</sub> = 13.24 ± 0.33 Ma; (<sup>40</sup>Ar/<sup>36</sup>Ar)<sub>i</sub> = 290 ± 6, MSWD = 1.7 for n = 15

‡ fraction ignored in the isochron given in the figure

SR 12-4  
Trachyandesite peperite / lava dome complex of Mina Victoria

Lat N      Long W  
27.34762   112.340263

Laser step-heating experiments with groundmass sample

| Pwr   | <sup>39</sup> Ar × 10 <sup>-6</sup> | % <sup>39</sup> Ar | <sup>40</sup> Ar*/ <sup>39</sup> Ar <sub>K</sub> | 1σ   | Age in Ma | 1σ    |   |   | % <sup>40</sup> Ar* | <sup>40</sup> Ar/ <sup>36</sup> Ar | <sup>37</sup> Ar <sub>Ca</sub> / <sup>39</sup> Ar <sub>K</sub> |
|-------|-------------------------------------|--------------------|--------------------------------------------------|------|-----------|-------|---|---|---------------------|------------------------------------|----------------------------------------------------------------|
| 0.40  | 22.12                               | 1.20               | -12.94                                           | 1.72 | -104.29   | 14.29 | a | ‡ | -13.77              | 259.72                             | 0.84                                                           |
| 1.50  | 89.34                               | 4.83               | 0.91                                             | 0.24 | 7.13      | 1.89  | b | ‡ | 9.17                | 325.32                             | 1.49                                                           |
| 2.00  | 158.04                              | 8.54               | 1.86                                             | 0.06 | 14.54     | 0.43  | c |   | 70.10               | 988.19                             | 1.36                                                           |
| 2.50  | 245.09                              | 13.24              | 1.81                                             | 0.04 | 14.10     | 0.28  | d |   | 84.18               | 1867.39                            | 1.24                                                           |
| 3.50  | 372.51                              | 20.12              | 1.79                                             | 0.02 | 13.96     | 0.14  | e |   | 92.66               | 4023.31                            | 1.10                                                           |
| 4.50  | 344.99                              | 18.64              | 1.78                                             | 0.02 | 13.86     | 0.12  | f |   | 98.21               | 16519.01                           | 0.91                                                           |
| 5.50  | 247.07                              | 13.35              | 1.79                                             | 0.02 | 13.95     | 0.16  | g |   | 99.00               | 29547.71                           | 0.84                                                           |
| 6.50  | 149.30                              | 8.07               | 1.73                                             | 0.03 | 13.53     | 0.24  | h |   | 95.98               | 7359.14                            | 0.94                                                           |
| 8.00  | 103.06                              | 5.57               | 1.75                                             | 0.04 | 13.63     | 0.31  | i |   | 94.41               | 5287.57                            | 1.78                                                           |
| 10.00 | 119.89                              | 6.46               | 1.84                                             | 0.06 | 14.36     | 0.44  | j |   | 96.36               | 8123.87                            | 4.62                                                           |

Integrated results

| <sup>39</sup> Ar × 10 <sup>-6</sup> | <sup>40</sup> Ar*/ <sup>39</sup> Ar <sub>K</sub> | 1σ   | Age in Ma | 1σ   | % <sup>40</sup> Ar* | <sup>40</sup> Ar/ <sup>36</sup> Ar | <sup>37</sup> Ar <sub>Ca</sub> / <sup>39</sup> Ar <sub>K</sub> |
|-------------------------------------|--------------------------------------------------|------|-----------|------|---------------------|------------------------------------|----------------------------------------------------------------|
| 1851.0                              | 1.57                                             | 0.03 | 12.28     | 0.23 | 45.58               | 542.96                             | 1.34                                                           |

CIC 93 RO J = 0.004341 ± 0.000008

t<sub>p</sub> = 13.90 ± 0.08 Ma; weighted mean of fractions d to j, representing 85.45% of <sup>39</sup>Ar released in 7 consecutive fractions, MSWD = 0.9

**Preferred age t<sub>c</sub> = 13.81 ± 0.10 Ma;** (<sup>40</sup>Ar/<sup>36</sup>Ar)<sub>i</sub> = 331 ± 21, MSWD = 0.6 for n = 8

‡ fraction ignored in the isochron given in the figure.

SR 12-2  
Basaltic andesite lava of Mina Victoria (coherent interior)

Lat N      Long W  
27.348089    112.3367

Laser step-heating experiments with groundmass sample

| Pwr  | <sup>39</sup> Ar × 10 <sup>-6</sup> | % <sup>39</sup> Ar | <sup>40</sup> Ar*/ <sup>39</sup> Ar <sub>K</sub> | 1σ   | Age in Ma | 1σ   |   | % <sup>40</sup> Ar* | <sup>40</sup> Ar/ <sup>36</sup> Ar | <sup>37</sup> Ar <sub>Ca</sub> / <sup>39</sup> Ar <sub>K</sub> |      |
|------|-------------------------------------|--------------------|--------------------------------------------------|------|-----------|------|---|---------------------|------------------------------------|----------------------------------------------------------------|------|
| 0.6  | 63.09                               | 4.65               | -5.09                                            | 0.60 | -39.30    | 4.69 | a | -12.86              | 261.84                             | 0.37                                                           |      |
| 1.2  | 150.85                              | 11.11              | -0.59                                            | 0.23 | -4.49     | 1.77 | b | -3.67               | 285.05                             | 0.59                                                           |      |
| 1.8  | 145.21                              | 10.69              | 0.45                                             | 0.18 | 3.47      | 1.36 | c | 4.57                | 309.65                             | 1.00                                                           |      |
| 2.4  | 152.93                              | 11.26              | 0.98                                             | 0.16 | 7.48      | 1.20 | d | 11.86               | 335.26                             | 1.15                                                           |      |
| 3.0  | 154.41                              | 11.37              | 1.33                                             | 0.14 | 10.10     | 1.08 | e | 19.56               | 367.36                             | 1.15                                                           |      |
| 3.6  | 149.20                              | 10.99              | 1.44                                             | 0.10 | 10.95     | 0.74 | f | 24.16               | 389.65                             | 1.15                                                           |      |
| 4.2  | 145.42                              | 10.71              | 1.59                                             | 0.09 | 12.12     | 0.67 | g | †                   | 28.50                              | 413.26                                                         | 1.34 |
| 5.0  | 97.69                               | 7.19               | 1.60                                             | 0.14 | 12.15     | 1.05 | h | †                   | 31.14                              | 429.13                                                         | 1.83 |
| 6.0  | 94.04                               | 6.92               | 1.59                                             | 0.14 | 12.09     | 1.03 | i | †                   | 28.23                              | 411.71                                                         | 2.20 |
| 8.0  | 70.66                               | 5.20               | 1.31                                             | 0.19 | 9.94      | 1.43 | j |                     | 19.53                              | 367.21                                                         | 2.93 |
| 12.0 | 134.83                              | 9.91               | 1.07                                             | 0.14 | 8.18      | 1.08 | k |                     | 15.26                              | 348.73                                                         | 4.64 |
| 0.5  | 65.85                               | 4.97               | -3.94                                            | 0.57 | -30.33    | 4.42 | l | -11.96              | 263.94                             | 0.31                                                           |      |
| 1.0  | 139.14                              | 10.50              | -0.61                                            | 0.26 | -4.68     | 2.02 | m | -3.91               | 284.38                             | 0.45                                                           |      |
| 1.6  | 125.05                              | 9.44               | 0.59                                             | 0.14 | 4.48      | 1.10 | n | 5.39                | 312.35                             | 0.93                                                           |      |
| 2.2  | 165.45                              | 12.48              | 1.08                                             | 0.17 | 8.23      | 1.26 | o | 14.00               | 343.62                             | 1.40                                                           |      |
| 2.8  | 192.46                              | 14.52              | 1.31                                             | 0.12 | 9.99      | 0.89 | p | 20.24               | 370.48                             | 1.32                                                           |      |
| 3.4  | 148.12                              | 11.18              | 1.49                                             | 0.11 | 11.35     | 0.83 | q | †                   | 25.17                              | 394.88                                                         | 1.36 |
| 4.2  | 130.25                              | 9.83               | 1.59                                             | 0.08 | 12.13     | 0.64 | r | †                   | 29.57                              | 419.56                                                         | 1.62 |
| 5.0  | 101.63                              | 7.66               | 1.85                                             | 0.10 | 14.04     | 0.72 | s |                     | 36.90                              | 468.31                                                         | 2.16 |
| 6.2  | 59.10                               | 4.46               | 1.69                                             | 0.12 | 12.83     | 0.91 | t |                     | 33.95                              | 447.38                                                         | 2.54 |
| 8.0  | 77.95                               | 5.87               | 1.56                                             | 0.19 | 11.91     | 1.45 | u |                     | 22.97                              | 383.63                                                         | 3.88 |
| 10.0 | 120.79                              | 9.09               | 1.16                                             | 0.17 | 8.83      | 1.28 | v |                     | 14.67                              | 346.31                                                         | 5.25 |

Integrated results

| <sup>39</sup> Ar × 10 <sup>-6</sup> | <sup>40</sup> Ar*/ <sup>39</sup> Ar <sub>K</sub> | 1σ   | Age in Ma | 1σ   | % <sup>40</sup> Ar* | <sup>40</sup> Ar/ <sup>36</sup> Ar | <sup>37</sup> Ar <sub>Ca</sub> / <sup>39</sup> Ar <sub>K</sub> |
|-------------------------------------|--------------------------------------------------|------|-----------|------|---------------------|------------------------------------|----------------------------------------------------------------|
| 1358.0                              | 0.74                                             | 0.08 | 5.61      | 0.63 | 7.79                | 320.46                             | 1.62                                                           |
| 1326.0                              | 0.86                                             | 0.08 | 6.54      | 0.62 | 9.4                 | 326.15                             | 1.81                                                           |

Laser step-heating experiments with plagioclase concentrate

| Pwr | <sup>39</sup> Ar × 10 <sup>-6</sup> | % <sup>39</sup> Ar | <sup>40</sup> Ar*/ <sup>39</sup> Ar <sub>K</sub> | 1σ   | Age in Ma | 1σ   |   | % <sup>40</sup> Ar* | <sup>40</sup> Ar/ <sup>36</sup> Ar | <sup>37</sup> Ar <sub>Ca</sub> / <sup>39</sup> Ar <sub>K</sub> |      |
|-----|-------------------------------------|--------------------|--------------------------------------------------|------|-----------|------|---|---------------------|------------------------------------|----------------------------------------------------------------|------|
| 2   | 42.41                               | 33.40              | 1.25                                             | 0.29 | 9.52      | 2.20 | 1 | †                   | 13.98                              | 343.54                                                         | 17.1 |
| 4   | 30.98                               | 24.25              | 1.36                                             | 0.17 | 10.38     | 1.31 | 2 | †                   | 38.20                              | 478.15                                                         | 26.5 |
| 7   | 14.99                               | 11.72              | 1.81                                             | 0.40 | 13.75     | 3.04 | 3 | †                   | 35.85                              | 460.61                                                         | 28.6 |
| 9   | 18.78                               | 14.63              | 1.44                                             | 0.44 | 11.00     | 3.32 | 4 | †                   | 20.57                              | 372.04                                                         | 33.5 |
| 12  | 20.75                               | 16.00              | 0.96                                             | 0.30 | 7.29      | 2.32 | 5 |                     | 15.50                              | 349.71                                                         | 49.9 |

SR 12-2 (cont.)  
Basaltic andesite lava of Mina Victoria (coherent interior)

Lat N      Long W  
27.348089    112.3367

Integrated results

| $^{39}\text{Ar} \times 10^{-6}$ | $^{40}\text{Ar}^*/^{39}\text{Ar}_K$ | $1\sigma$ | Age in Ma | $1\sigma$ | % $^{40}\text{Ar}^*$ | $^{40}\text{Ar}/^{36}\text{Ar}$ | $^{37}\text{Ar}_{Ca}/^{39}\text{Ar}_K$ |
|---------------------------------|-------------------------------------|-----------|-----------|-----------|----------------------|---------------------------------|----------------------------------------|
| 127.90                          | 1.32                                | 0.15      | 10.08     | 1.12      | 20.51                | 371.76                          | 28.38                                  |

CIC 93 BOO J = 0.004232 ± 0.000018

**Preferred age  $t_p$  = 10.08 ± 0.92 Ma**

Weighted mean of plagioclase experiment, fractions 1 to 5, representing 100% of  $^{39}\text{Ar}$  released in 5 consecutive fractions, MSWD = 0.8

$t = 12.12 \pm 0.51$  Ma; weighted mean of groundmass experimento, fractions g to i, representing 24.82% of  $^{39}\text{Ar}$  released in 3 consecutive fractions, MSWD < 0.1

$t_c = 12.6 \pm 1.6$  Ma;  $(^{40}\text{Ar}/^{36}\text{Ar})_i = 287 \pm 15$ , MSWD = 0.6 for n = 10 (gms and plg)

† fractions used to calculate the isochron age

SR 08-4  
Basaltic andesite lava (block from basal flow breccia)

Lat N      Long W  
27.336636   112.337418

Laser step-heating experiments with groundmass sample

| Pwr  | <sup>39</sup> Ar × 10 <sup>-6</sup> | % <sup>39</sup> Ar† | <sup>40</sup> Ar*/ <sup>39</sup> Ar <sub>K</sub> | 1σ   | Age in Ma | 1σ   |   |       | % <sup>40</sup> Ar* | <sup>40</sup> Ar/ <sup>36</sup> Ar | <sup>37</sup> Ar <sub>Ca</sub> / <sup>39</sup> Ar <sub>K</sub> |
|------|-------------------------------------|---------------------|--------------------------------------------------|------|-----------|------|---|-------|---------------------|------------------------------------|----------------------------------------------------------------|
| 0.5  | 124.161                             | 12.41               | 0.90                                             | 0.14 | 7.05      | 1.06 | a | ‡     | 11.07               | 332.27                             | 0.305                                                          |
| 1.2  | 204.103                             | 20.41               | 1.62                                             | 0.06 | 12.61     | 0.50 | b |       | 38.10               | 477.38                             | 0.433                                                          |
| 1.8  | 161.526                             | 16.15               | 1.52                                             | 0.08 | 11.86     | 0.61 | c |       | 44.57               | 533.07                             | 0.926                                                          |
| 2.5  | 139.419                             | 13.94               | 1.61                                             | 0.07 | 12.54     | 0.56 | d |       | 43.71               | 524.93                             | 1.524                                                          |
| 3.3  | 106.629                             | 10.66               | 1.41                                             | 0.10 | 10.98     | 0.74 | e |       | 41.70               | 506.89                             | 1.988                                                          |
| 4.3  | 83.625                              | 8.36                | 1.56                                             | 0.09 | 12.20     | 0.68 | f |       | 48.48               | 573.54                             | 2.534                                                          |
| 6.0  | 90.680                              | 9.07                | 1.63                                             | 0.14 | 12.69     | 1.10 | g |       | 41.72               | 507.02                             | 3.791                                                          |
| 8.0  | fraction lost                       |                     |                                                  |      |           |      |   |       |                     |                                    |                                                                |
| 0.4  | 64.380                              | 3.88                | 0.17                                             | 0.26 | 1.34      | 2.00 | h | ‡     | 1.69                | 300.59                             | 0.363                                                          |
| 0.8  | 195.682                             | 11.78               | 0.84                                             | 0.11 | 6.53      | 0.85 | i |       | 15.12               | 348.13                             | 0.308                                                          |
| 1.2  | 206.146                             | 12.41               | 1.39                                             | 0.07 | 10.88     | 0.56 | j |       | 35.09               | 455.26                             | 0.460                                                          |
| 1.6  | 207.993                             | 12.52               | 1.54                                             | 0.06 | 12.06     | 0.43 | k |       | 46.97               | 557.23                             | 0.798                                                          |
| 2.2  | 172.152                             | 10.36               | 1.50                                             | 0.06 | 11.69     | 0.50 | l |       | 48.47               | 573.45                             | 1.218                                                          |
| 3.0  | 204.277                             | 12.29               | 1.49                                             | 0.05 | 11.66     | 0.38 | m |       | 49.01               | 579.56                             | 1.682                                                          |
| 5.0  | 212.745                             | 12.79               | 1.44                                             | 0.06 | 11.21     | 0.49 | n |       | 45.10               | 538.28                             | 2.482                                                          |
| 7.0  | 160.947                             | 9.67                | 1.40                                             | 0.08 | 10.91     | 0.62 | o |       | 40.75               | 498.69                             | 3.192                                                          |
| 12.0 | 238.483                             | 14.32               | 1.49                                             | 0.07 | 11.66     | 0.58 | p | 41.73 | 507.11              | 3.635                              |                                                                |

Integrated results

| <sup>39</sup> Ar × 10 <sup>-6</sup> | <sup>40</sup> Ar*/ <sup>39</sup> Ar <sub>K</sub> | 1σ   | Age in Ma | 1σ   | % <sup>40</sup> Ar* | <sup>40</sup> Ar/ <sup>36</sup> Ar | <sup>37</sup> Ar <sub>Ca</sub> / <sup>39</sup> Ar <sub>K</sub> |
|-------------------------------------|--------------------------------------------------|------|-----------|------|---------------------|------------------------------------|----------------------------------------------------------------|
| 1663.0                              | 1.34                                             | 0.03 | 10.48     | 0.26 | 34.48               | 450.98                             | 1.69                                                           |

CIC 93 RO J = 0.004341 ± 0.000008

t<sub>p</sub> = 11.50 ± 0.18 Ma; weighted mean of fractions j to p, representing 84.36% of <sup>39</sup>Ar released in 7 consecutive fractions, MSWD = 0.7

**Preferred age t<sub>c</sub> = 10.83 ± 0.95 Ma;** (<sup>40</sup>Ar/<sup>36</sup>Ar)<sub>i</sub> = 314 ± 18, MSWD = 1.2 for n = 13

‡ fraction ignored in the isochron given in the figure

† Fraction g from the 1<sup>st</sup> experiment, was lost during the argon extraction. No integrated age can be calculated, the %<sup>39</sup>Ar released given is an estimate only. The data were only used in the isochron age calculaion

SR 15-8  
Basaltic trachyandesite lava, interstratified with the El Morro Tuff

Lat N      Long W  
27.321388   112.241944

Laser step-heating experiments with groundmass sample

| Pwr  | <sup>39</sup> Ar × 10 <sup>-6</sup> | % <sup>39</sup> Ar | <sup>40</sup> Ar*/ <sup>39</sup> Ar <sub>K</sub> | 1σ    | Age in Ma | 1σ     |   |   | % <sup>40</sup> Ar* | <sup>40</sup> Ar/ <sup>36</sup> Ar | <sup>37</sup> Ar <sub>Ca</sub> / <sup>39</sup> Ar <sub>K</sub> |
|------|-------------------------------------|--------------------|--------------------------------------------------|-------|-----------|--------|---|---|---------------------|------------------------------------|----------------------------------------------------------------|
| 0.6  | 0.60                                | 36.45              | 3.29                                             | -7.34 | 0.84      | -58.42 | a | ‡ | -12.88              | 261.79                             | 0.57                                                           |
| 1.2  | 1.20                                | 77.83              | 7.02                                             | 0.53  | 0.18      | 4.17   | b | ‡ | 6.81                | 317.09                             | 1.15                                                           |
| 1.8  | 1.80                                | 149.39             | 13.48                                            | 1.26  | 0.04      | 9.84   | c |   | 62.99               | 798.43                             | 1.36                                                           |
| 2.5  | 2.50                                | 196.37             | 17.72                                            | 1.23  | 0.04      | 9.63   | d |   | 77.39               | 1307.10                            | 1.48                                                           |
| 3.3  | 3.30                                | 210.67             | 19.01                                            | 1.26  | 0.03      | 9.86   | e |   | 77.35               | 1304.73                            | 1.24                                                           |
| 4.3  | 4.30                                | 137.44             | 12.40                                            | 1.22  | 0.05      | 9.56   | f |   | 64.16               | 824.56                             | 1.17                                                           |
| 6.0  | 6.00                                | 155.07             | 13.99                                            | 1.25  | 0.05      | 9.75   | g |   | 48.68               | 575.82                             | 1.11                                                           |
| 8.0  | 8.00                                | 145.48             | 13.09                                            | 1.00  | 0.10      | 7.81   | h | ‡ | 21.42               | 376.05                             | 5.71                                                           |
| 0.5  | 38.714                              | 2.70               | -8.59                                            | 1.04  | -69.15    | 8.54   | i | ‡ | -13.64              | 260.03                             | 0.600                                                          |
| 1.0  | 63.358                              | 4.41               | 0.41                                             | 0.28  | 3.23      | 2.21   | j | ‡ | 4.00                | 307.81                             | 0.920                                                          |
| 1.5  | 145.650                             | 10.15              | 1.15                                             | 0.08  | 9.07      | 0.63   | k |   | 41.34               | 503.72                             | 1.274                                                          |
| 2.2  | 247.718                             | 17.25              | 1.22                                             | 0.03  | 9.57      | 0.24   | l |   | 74.56               | 1161.64                            | 1.521                                                          |
| 2.9  | 231.103                             | 16.10              | 1.26                                             | 0.02  | 9.89      | 0.18   | m |   | 85.17               | 1992.93                            | 1.392                                                          |
| 3.8  | 217.423                             | 15.15              | 1.19                                             | 0.03  | 9.41      | 0.26   | n |   | 75.56               | 1208.84                            | 1.194                                                          |
| 4.6  | 150.953                             | 10.52              | 1.16                                             | 0.04  | 9.11      | 0.34   | o |   | 59.44               | 728.54                             | 1.081                                                          |
| 5.5  | 117.063                             | 8.16               | 1.09                                             | 0.11  | 8.60      | 0.84   | p |   | 41.87               | 508.35                             | 1.116                                                          |
| 6.5  | 79.998                              | 5.57               | 1.21                                             | 0.07  | 9.53      | 0.56   | q |   | 40.55               | 497.02                             | 2.026                                                          |
| 7.5  | 61.069                              | 4.24               | 1.41                                             | 0.17  | 11.11     | 1.33   | r |   | 35.15               | 455.66                             | 6.292                                                          |
| 12.0 | 83.044                              | 5.77               | 1.19                                             | 0.14  | 9.34      | 1.12   | s |   | 22.57               | 381.62                             | 5.994                                                          |

Integrated results

| <sup>39</sup> Ar × 10 <sup>-6</sup> | <sup>40</sup> Ar*/ <sup>39</sup> Ar <sub>K</sub> | 1σ   | Age in Ma | 1σ   | % <sup>40</sup> Ar* | <sup>40</sup> Ar/ <sup>36</sup> Ar | <sup>37</sup> Ar <sub>Ca</sub> / <sup>39</sup> Ar <sub>K</sub> |
|-------------------------------------|--------------------------------------------------|------|-----------|------|---------------------|------------------------------------|----------------------------------------------------------------|
| 1109.0                              | 0.88                                             | 0.04 | 6.89      | 0.34 | 19.61               | 367.61                             | 1.83                                                           |
| 1436.0                              | 0.90                                             | 0.04 | 7.05      | 0.33 | 21.23               | 375.16                             | 1.78                                                           |

CIC 93 RO J = 0.004341 ± 0.000008

t<sub>p</sub> = 9.75 ± 0.14 Ma; weighted mean of fractions c to g, representing 76.60% of <sup>39</sup>Ar released in 5 consecutive fractions, MSWD = 0.19

**Preferred age t<sub>c</sub> = 9.69 ± 0.12 Ma;** (<sup>40</sup>Ar/<sup>36</sup>Ar)<sub>i</sub> = 291 ± 6, MSWD = 0.97 for n = 14

‡ fraction ignored in the isochron given in the figure

SR 14-1  
Upper basaltic andesite lava of Cerro Juanita (coherent interior)

Lat N      Long W  
27.314722   112.299444

Laser step-heating experiments with whole rock sample

| Pwr  | <sup>39</sup> Ar × 10 <sup>-6</sup> | % <sup>39</sup> Ar | <sup>40</sup> Ar*/ <sup>39</sup> Ar <sub>K</sub> | 1σ   | Age in Ma | 1σ   |   |   | % <sup>40</sup> Ar* | <sup>40</sup> Ar/ <sup>36</sup> Ar | <sup>37</sup> Ar <sub>Ca</sub> / <sup>39</sup> Ar <sub>K</sub> |
|------|-------------------------------------|--------------------|--------------------------------------------------|------|-----------|------|---|---|---------------------|------------------------------------|----------------------------------------------------------------|
| 0.5  | 27.93                               | 3.67               | -3.83                                            | 0.63 | -30.24    | 5.04 | a | ‡ | -8.94               | 271.24                             | 0.95                                                           |
| 1.1  | 58.47                               | 7.67               | 1.11                                             | 0.15 | 8.67      | 1.18 | b | ‡ | 24.35               | 390.62                             | 1.96                                                           |
| 1.6  | 85.66                               | 11.23              | 1.22                                             | 0.07 | 9.53      | 0.56 | c |   | 58.79               | 717.05                             | 2.62                                                           |
| 2.2  | 91.38                               | 11.99              | 1.23                                             | 0.05 | 9.59      | 0.40 | d |   | 73.23               | 1103.72                            | 2.36                                                           |
| 2.8  | 95.17                               | 12.49              | 1.22                                             | 0.05 | 9.55      | 0.39 | e |   | 64.55               | 833.53                             | 1.80                                                           |
| 3.6  | 117.73                              | 15.45              | 1.32                                             | 0.07 | 10.33     | 0.55 | f |   | 56.37               | 677.29                             | 1.43                                                           |
| 4.5  | 96.43                               | 12.65              | 1.17                                             | 0.09 | 9.10      | 0.69 | g |   | 40.63               | 497.75                             | 1.60                                                           |
| 6.0  | 73.21                               | 9.60               | 1.33                                             | 0.16 | 10.41     | 1.27 | h |   | 36.05               | 462.09                             | 3.10                                                           |
| 8.0  | 116.54                              | 15.26              | 1.04                                             | 0.09 | 8.15      | 0.70 | i | ‡ | 19.59               | 367.49                             | 5.14                                                           |
| 0.4  | 24.490                              | 2.05               | -6.92                                            | 1.05 | -55.51    | 8.57 | j | ‡ | -11.54              | 264.92                             | 0.765                                                          |
| 1.0  | 76.298                              | 6.38               | 0.21                                             | 0.24 | 1.62      | 1.92 | k | ‡ | 1.79                | 300.89                             | 1.668                                                          |
| 1.5  | 101.004                             | 8.44               | 1.33                                             | 0.07 | 10.48     | 0.54 | l |   | 51.03               | 603.38                             | 2.347                                                          |
| 2.0  | 115.629                             | 9.66               | 1.29                                             | 0.06 | 10.15     | 0.48 | m |   | 69.41               | 966.09                             | 2.639                                                          |
| 2.6  | 122.482                             | 10.24              | 1.27                                             | 0.05 | 9.96      | 0.37 | n |   | 72.10               | 1059.30                            | 2.276                                                          |
| 3.5  | 162.976                             | 13.62              | 1.28                                             | 0.04 | 10.09     | 0.35 | o |   | 66.82               | 890.56                             | 1.746                                                          |
| 4.5  | 163.993                             | 13.71              | 1.26                                             | 0.05 | 9.88      | 0.37 | p |   | 53.59               | 636.65                             | 1.381                                                          |
| 6.5  | 174.305                             | 14.57              | 1.12                                             | 0.07 | 8.86      | 0.53 | q | ‡ | 35.13               | 455.52                             | 1.540                                                          |
| 7.5  | 63.381                              | 5.30               | 0.90                                             | 0.15 | 7.10      | 1.20 | r | ‡ | 22.92               | 383.35                             | 2.565                                                          |
| 12.0 | 192.204                             | 16.03              | 0.88                                             | 0.07 | 6.95      | 0.59 | s | ‡ | 18.66               | 363.28                             | 5.365                                                          |

Integrated results

| <sup>39</sup> Ar × 10 <sup>-6</sup> | <sup>40</sup> Ar*/ <sup>39</sup> Ar <sub>K</sub> | 1σ   | Age in Ma | 1σ   | % <sup>40</sup> Ar* | <sup>40</sup> Ar/ <sup>36</sup> Ar | <sup>37</sup> Ar <sub>Ca</sub> / <sup>39</sup> Ar <sub>K</sub> |
|-------------------------------------|--------------------------------------------------|------|-----------|------|---------------------|------------------------------------|----------------------------------------------------------------|
| 762.50                              | 1.02                                             | 0.05 | 7.98      | 0.36 | 22.77               | 382.60                             | 2.49                                                           |
| 1197.0                              | 0.94                                             | 0.04 | 7.33      | 0.34 | 20.58               | 372.07                             | 2.46                                                           |

CIC 93 RO J = 0.004341 ± 0.000008

**Preferred age t<sub>p</sub> = 9.66 ± 0.21 Ma**

Weighted mean of fractions c to h, representing 73.41% of <sup>39</sup>Ar released in 6 consecutive fractions, MSWD = 0.5

t<sub>c</sub> = 9.71 ± 0.34 Ma; (<sup>40</sup>Ar/<sup>36</sup>Ar)<sub>i</sub> = 302 ± 15, MSWD = 0.5 for n = 11

‡ fraction ignored in the isochron given in the figure

SR 14-5  
Upper andesite lava of Cerro Montado (block from flow breccia)

Lat N      Long W  
27.301388   112.2825

Laser step-heating experiments with whole rock sample

| Pwr  | <sup>39</sup> Ar × 10 <sup>-6</sup> | % <sup>39</sup> Ar | <sup>40</sup> Ar*/ <sup>39</sup> Ar <sub>K</sub> | 1σ   | Age in Ma | 1σ    |   |   | % <sup>40</sup> Ar* | <sup>40</sup> Ar/ <sup>36</sup> Ar | <sup>37</sup> Ar <sub>Ca</sub> / <sup>39</sup> Ar <sub>K</sub> |
|------|-------------------------------------|--------------------|--------------------------------------------------|------|-----------|-------|---|---|---------------------|------------------------------------|----------------------------------------------------------------|
| 0.5  | 24.47                               | 2.60               | -12.46                                           | 1.57 | -100.30   | 12.97 | a | ‡ | -13.51              | 260.33                             | 0.421                                                          |
| 1.2  | 62.07                               | 6.59               | 0.65                                             | 0.26 | 5.10      | 2.01  | b | ‡ | 6.86                | 317.28                             | 1.058                                                          |
| 1.8  | 88.08                               | 9.35               | 1.15                                             | 0.08 | 8.95      | 0.65  | c | ‡ | 38.29               | 478.85                             | 1.500                                                          |
| 2.5  | 135.81                              | 14.41              | 1.15                                             | 0.08 | 8.97      | 0.64  | d | ‡ | 55.95               | 670.76                             | 1.390                                                          |
| 3.2  | 117.09                              | 12.43              | 1.28                                             | 0.05 | 10.02     | 0.35  | e | ‡ | 67.08               | 897.56                             | 1.286                                                          |
| 4.0  | 112.61                              | 11.95              | 1.29                                             | 0.07 | 10.10     | 0.52  | f | ‡ | 56.29               | 676.06                             | 1.179                                                          |
| 5.5  | 174.44                              | 18.52              | 1.10                                             | 0.06 | 8.62      | 0.50  | g | ‡ | 33.53               | 444.56                             | 1.048                                                          |
| 7.0  | 109.60                              | 11.63              | 1.10                                             | 0.09 | 8.59      | 0.72  | h | ‡ | 21.35               | 375.73                             | 1.753                                                          |
| 10.0 | 118.17                              | 12.52              | 0.38                                             | 0.13 | 2.96      | 1.04  | i | ‡ | 4.53                | 309.53                             | 3.883                                                          |
| 0.5  | 24.04                               | 1.96               | -12.33                                           | 1.49 | -99.22    | 12.29 | j | ‡ | -14.10              | 258.98                             | 0.65                                                           |
| 1.2  | 62.99                               | 5.14               | 0.55                                             | 0.24 | 4.32      | 1.86  | k | ‡ | 5.88                | 313.96                             | 0.79                                                           |
| 1.8  | 91.77                               | 7.48               | 1.11                                             | 0.07 | 8.68      | 0.56  | l |   | 44.13               | 528.89                             | 1.36                                                           |
| 2.5  | 131.90                              | 10.75              | 1.21                                             | 0.07 | 9.44      | 0.54  | m |   | 56.47               | 678.78                             | 1.68                                                           |
| 3.5  | 177.20                              | 14.44              | 1.13                                             | 0.05 | 8.87      | 0.43  | n |   | 52.00               | 615.61                             | 1.57                                                           |
| 4.5  | 167.34                              | 13.64              | 1.14                                             | 0.04 | 8.94      | 0.34  | o |   | 58.89               | 718.86                             | 1.41                                                           |
| 6.0  | 238.64                              | 19.46              | 1.11                                             | 0.04 | 8.66      | 0.35  | p |   | 44.78               | 535.16                             | 1.26                                                           |
| 8.0  | 173.32                              | 14.13              | 1.17                                             | 0.10 | 9.15      | 0.81  | q |   | 32.52               | 437.89                             | 1.35                                                           |
| 10.0 | 90.46                               | 7.37               | 1.06                                             | 0.10 | 8.32      | 0.81  | r |   | 23.54               | 386.50                             | 2.41                                                           |
| 12.0 | 69.20                               | 5.63               | 0.89                                             | 0.13 | 6.93      | 1.03  | s | ‡ | 11.31               | 333.19                             | 5.80                                                           |

Integrated results

| <sup>39</sup> Ar × 10 <sup>-6</sup> | <sup>40</sup> Ar*/ <sup>39</sup> Ar <sub>K</sub> | 1σ   | Age in Ma | 1σ   | % <sup>40</sup> Ar* | <sup>40</sup> Ar/ <sup>36</sup> Ar | <sup>37</sup> Ar <sub>Ca</sub> / <sup>39</sup> Ar <sub>K</sub> |
|-------------------------------------|--------------------------------------------------|------|-----------|------|---------------------|------------------------------------|----------------------------------------------------------------|
| 942.30                              | 0.69                                             | 0.06 | 5.36      | 0.50 | 10.77               | 331.18                             | 1.61                                                           |
| 1227.0                              | 0.83                                             | 0.05 | 6.48      | 0.38 | 16.72               | 354.82                             | 1.69                                                           |

CIC 93 RO J = 0.004341 ± 0.000008

Preferred age t<sub>p</sub> = 8.84 ± 0.16 Ma

Weighted mean of fractions l to r, representing 87.27% of <sup>39</sup>Ar released in 7 consecutive fractions, MSWD = 0.4

t<sub>c</sub> = 9.10 ± 0.39 Ma; (<sup>40</sup>Ar/<sup>36</sup>Ar)<sub>i</sub> = 288 ± 10, MSWD = 0.4 for n = 7 (plateau fractions)

‡ fractions ignored in the isochron given in the figure

SL 08-4  
Andesite pyroxene lava from Cerro San Lucas (coherent interior)

Lat N      Long W  
27.192278   112.240444

Laser step-heating experiments with groundmass sample

| Pwr  | <sup>39</sup> Ar × 10 <sup>-6</sup> | % <sup>39</sup> Ar | <sup>40</sup> Ar*/ <sup>39</sup> Ar <sub>K</sub> | 1σ   | Age in Ma | 1σ   |   |   | % <sup>40</sup> Ar* | <sup>40</sup> Ar/ <sup>36</sup> Ar | <sup>37</sup> Ar <sub>Ca</sub> / <sup>39</sup> Ar <sub>K</sub> |
|------|-------------------------------------|--------------------|--------------------------------------------------|------|-----------|------|---|---|---------------------|------------------------------------|----------------------------------------------------------------|
| 0.4  | 27.81                               | 1.29               | -3.90                                            | 0.93 | -30.01    | 7.19 | a | ‡ | -9.62               | 269.57                             | 0.39                                                           |
| 0.8  | 129.24                              | 5.98               | 0.64                                             | 0.12 | 4.90      | 0.89 | b | ‡ | 9.83                | 327.73                             | 0.58                                                           |
| 1.8  | 303.99                              | 14.06              | 1.44                                             | 0.04 | 10.96     | 0.27 | c |   | 69.69               | 974.99                             | 0.79                                                           |
| 2.4  | 336.40                              | 15.56              | 1.38                                             | 0.02 | 10.48     | 0.16 | d |   | 82.42               | 1680.57                            | 0.95                                                           |
| 3.0  | 300.37                              | 13.89              | 1.38                                             | 0.02 | 10.53     | 0.14 | e |   | 88.08               | 2478.86                            | 1.12                                                           |
| 3.8  | 250.01                              | 11.56              | 1.31                                             | 0.02 | 10.00     | 0.13 | f |   | 82.38               | 1676.66                            | 1.22                                                           |
| 4.6  | 290.89                              | 13.45              | 1.37                                             | 0.02 | 10.44     | 0.16 | g |   | 80.60               | 1522.82                            | 1.15                                                           |
| 5.5  | 210.32                              | 9.73               | 1.37                                             | 0.03 | 10.41     | 0.22 | h |   | 75.49               | 1205.68                            | 1.05                                                           |
| 7.0  | 131.21                              | 6.07               | 1.42                                             | 0.03 | 10.84     | 0.23 | i |   | 74.19               | 1145.02                            | 1.53                                                           |
| 8.0  | 50.93                               | 2.35               | 1.42                                             | 0.13 | 10.80     | 0.98 | j |   | 60.59               | 749.86                             | 2.52                                                           |
| 12.0 | 131.06                              | 6.05               | 1.10                                             | 0.07 | 8.37      | 0.56 | k | ‡ | 28.43               | 412.89                             | 3.75                                                           |
| 0.7  | 66.27                               | 4.24               | -0.65                                            | 0.31 | -4.96     | 2.38 | l | ‡ | -3.74               | 284.85                             | 0.40                                                           |
| 1.4  | 168.13                              | 10.74              | 1.32                                             | 0.06 | 10.04     | 0.49 | m | ‡ | 45.72               | 544.35                             | 0.79                                                           |
| 2.1  | 295.02                              | 18.85              | 1.37                                             | 0.02 | 10.42     | 0.18 | n |   | 79.38               | 1433.02                            | 1.01                                                           |
| 2.7  | 151.61                              | 9.69               | 1.36                                             | 0.03 | 10.38     | 0.21 | o |   | 88.63               | 2599.63                            | 1.16                                                           |
| 3.5  | 229.10                              | 14.63              | 1.37                                             | 0.02 | 10.44     | 0.13 | p |   | 87.16               | 2301.68                            | 1.46                                                           |
| 4.3  | 167.19                              | 10.68              | 1.36                                             | 0.03 | 10.34     | 0.22 | q |   | 82.81               | 1718.74                            | 1.42                                                           |
| 5.2  | 162.60                              | 10.39              | 1.40                                             | 0.03 | 10.69     | 0.26 | r |   | 84.14               | 1863.45                            | 1.23                                                           |
| 6.0  | 120.64                              | 7.71               | 1.42                                             | 0.05 | 10.80     | 0.35 | s |   | 80.07               | 1483.00                            | 1.27                                                           |
| 8.0  | 118.59                              | 7.57               | 1.43                                             | 0.06 | 10.86     | 0.48 | t |   | 65.73               | 862.33                             | 2.25                                                           |
| 12.0 | 86.36                               | 5.51               | 1.49                                             | 0.10 | 11.37     | 0.79 | u |   | 45.75               | 544.70                             | 3.25                                                           |

Integrated results

| <sup>39</sup> Ar × 10 <sup>-6</sup> | <sup>40</sup> Ar*/ <sup>39</sup> Ar <sub>K</sub> | 1σ   | Age in Ma | 1σ   | % <sup>40</sup> Ar* | <sup>40</sup> Ar/ <sup>36</sup> Ar | <sup>37</sup> Ar <sub>Ca</sub> / <sup>39</sup> Ar <sub>K</sub> |
|-------------------------------------|--------------------------------------------------|------|-----------|------|---------------------|------------------------------------|----------------------------------------------------------------|
| 2162.0                              | 1.25                                             | 0.02 | 9.54      | 0.16 | 46.82               | 555.64                             | 1.23                                                           |
| 1566.0                              | 1.30                                             | 0.02 | 9.87      | 0.17 | 50.25               | 594.00                             | 1.35                                                           |

CIC 93 BOO J = 0.004232 ± 0.000018

t<sub>p</sub> = 10.48 ± 0.09 Ma; weighted mean of fractions n to u, representing 85.03% of <sup>39</sup>Ar released in 8 consecutive fractions, MSWD = 0.6

**Preferred age t<sub>c</sub> = 10.11 ± 0.14 Ma;** (<sup>40</sup>Ar/<sup>36</sup>Ar)<sub>i</sub> = 336 ± 16, MSWD = 1.2 for n = 16

‡ fraction ignored in the isochron given in the figure

SL 08-1  
Trachyandesite hornblende intrusion of Cerro San Lucas

Lat N      Long W  
27.18728   112.245441

Laser step-heating experiments with groundmass sample

| Pwr  | <sup>39</sup> Ar × 10 <sup>-6</sup> | % <sup>39</sup> Ar | <sup>40</sup> Ar*/ <sup>39</sup> Ar <sub>K</sub> | 1σ   | Age in Ma | 1σ    |   | % <sup>40</sup> Ar* | <sup>40</sup> Ar/ <sup>36</sup> Ar | <sup>37</sup> Ar <sub>Ca</sub> / <sup>39</sup> Ar <sub>K</sub> |
|------|-------------------------------------|--------------------|--------------------------------------------------|------|-----------|-------|---|---------------------|------------------------------------|----------------------------------------------------------------|
| 0.6  | 51.71                               | 2.34               | 7.66                                             | 2.25 | 57.57     | 16.66 | a | 2.69                | 303.67                             | 0.56                                                           |
| 1.0  | 95.97                               | 4.34               | -4.58                                            | 0.48 | -35.30    | 3.77  | b | -10.98              | 266.26                             | 0.58                                                           |
| 1.5  | 219.85                              | 9.94               | -0.25                                            | 0.12 | -1.94     | 0.95  | c | -2.49               | 288.32                             | 0.57                                                           |
| 2.0  | 217.08                              | 9.82               | 0.57                                             | 0.12 | 4.32      | 0.91  | d | 9.89                | 327.92                             | 0.52                                                           |
| 2.5  | 197.01                              | 8.91               | 0.78                                             | 0.07 | 5.95      | 0.52  | e | 21.28               | 375.36                             | 0.49                                                           |
| 3.0  | 169.16                              | 7.65               | 1.04                                             | 0.06 | 7.95      | 0.47  | f | 37.18               | 470.40                             | 0.47                                                           |
| 3.5  | 164.50                              | 7.44               | 0.94                                             | 0.06 | 7.13      | 0.43  | g | 35.63               | 459.09                             | 0.48                                                           |
| 4.0  | 132.50                              | 5.99               | 1.01                                             | 0.07 | 7.71      | 0.57  | h | 33.53               | 444.56                             | 0.51                                                           |
| 5.0  | 156.02                              | 7.06               | 1.01                                             | 0.07 | 7.67      | 0.55  | i | 28.89               | 415.55                             | 0.57                                                           |
| 6.0  | 183.21                              | 8.28               | 0.83                                             | 0.07 | 6.30      | 0.50  | j | 20.63               | 372.32                             | 0.84                                                           |
| 7.5  | 241.65                              | 10.93              | 0.77                                             | 0.10 | 5.90      | 0.77  | k | 20.27               | 370.62                             | 1.14                                                           |
| 10.0 | 382.91                              | 17.30              | 0.75                                             | 0.05 | 5.71      | 0.37  | l | 21.37               | 375.79                             | 2.15                                                           |
| 1.2  | 114.83                              | 6.63               | -2.70                                            | 0.86 | -20.74    | 6.64  | m | -3.26               | 286.18                             | 0.56                                                           |
| 2.0  | 257.15                              | 14.85              | 0.11                                             | 0.10 | 0.87      | 0.74  | n | 1.66                | 300.48                             | 0.53                                                           |
| 3.0  | 305.01                              | 17.62              | 0.95                                             | 0.03 | 7.21      | 0.25  | o | 31.23               | 429.69                             | 0.46                                                           |
| 3.8  | 207.10                              | 11.96              | 0.99                                             | 0.04 | 7.56      | 0.31  | p | 39.52               | 488.56                             | 0.46                                                           |
| 5.0  | 124.53                              | 7.19               | 0.91                                             | 0.04 | 6.93      | 0.34  | q | 31.80               | 433.28                             | 0.50                                                           |
| 6.5  | 250.50                              | 14.46              | 0.82                                             | 0.06 | 6.26      | 0.42  | r | 27.28               | 406.35                             | 0.81                                                           |
| 8.0  | 294.53                              | 17.00              | 0.73                                             | 0.05 | 5.55      | 0.41  | s | 20.68               | 372.54                             | 1.56                                                           |
| 10.0 | 178.43                              | 10.29              | 0.98                                             | 0.07 | 7.44      | 0.56  | t | 28.42               | 412.85                             | 2.78                                                           |

Integrated results

| <sup>39</sup> Ar × 10 <sup>-6</sup> | <sup>40</sup> Ar*/ <sup>39</sup> Ar <sub>K</sub> | 1σ   | Age in Ma | 1σ   | % <sup>40</sup> Ar* | <sup>40</sup> Ar/ <sup>36</sup> Ar | <sup>37</sup> Ar <sub>Ca</sub> / <sup>39</sup> Ar <sub>K</sub> |
|-------------------------------------|--------------------------------------------------|------|-----------|------|---------------------|------------------------------------|----------------------------------------------------------------|
| 2212.0                              | 0.64                                             | 0.10 | 4.91      | 0.73 | 5.13                | 311.46                             | 0.90                                                           |
| 1732. 0                             | 0.53                                             | 0.08 | 4.05      | 0.58 | 5.94                | 314.16                             | 0.96                                                           |

Laser step-heating experiments with hornblende concentrate

| Pwr  | <sup>39</sup> Ar × 10 <sup>-6</sup> | % <sup>39</sup> Ar | <sup>40</sup> Ar*/ <sup>39</sup> Ar <sub>K</sub> | 1σ   | Age in Ma | 1σ   |   | % <sup>40</sup> Ar* | <sup>40</sup> Ar/ <sup>36</sup> Ar | <sup>37</sup> Ar <sub>Ca</sub> / <sup>39</sup> Ar <sub>K</sub> |
|------|-------------------------------------|--------------------|--------------------------------------------------|------|-----------|------|---|---------------------|------------------------------------|----------------------------------------------------------------|
| 4.0  | 50.03                               | 8.87               | -3.55                                            | 0.62 | -27.3     | 4.81 | u | -10.61              | 267.15                             | 1.74                                                           |
| 5.5  | 96.76                               | 17.11              | -0.09                                            | 0.23 | -0.67     | 1.73 | v | -0.96               | 292.69                             | 5.16                                                           |
| 7.0  | 219.95                              | 38.89              | 0.81                                             | 0.05 | 6.18      | 0.36 | w | 25.5                | 396.62                             | 5.35                                                           |
| 10.0 | 198.74                              | 35.13              | 0.78                                             | 0.05 | 5.95      | 0.36 | x | 36.4                | 464.66                             | 5.73                                                           |

Integrated results

| <sup>39</sup> Ar × 10 <sup>-6</sup> | <sup>40</sup> Ar*/ <sup>39</sup> Ar <sub>K</sub> | 1σ   | Age in Ma | 1σ   | % <sup>40</sup> Ar* | <sup>40</sup> Ar/ <sup>36</sup> Ar | <sup>37</sup> Ar <sub>Ca</sub> / <sup>39</sup> Ar <sub>K</sub> |
|-------------------------------------|--------------------------------------------------|------|-----------|------|---------------------|------------------------------------|----------------------------------------------------------------|
| 565.50                              | 0.26                                             | 0.08 | 1.98      | 0.62 | 3.98                | 307.75                             | 5.13                                                           |

SL 08-1 (cont.)  
Trachyandesite hornblende intrusion of Cerro San Lucas

| Lat N    | Long W     |
|----------|------------|
| 27.18728 | 112.245441 |

CIC 93 BOO J =  $0.004232 \pm 0.000018$

**Preferred age  $W_m = 6.06 \pm 0.27$  Ma**

hornblende sample; weighted mean of fractions w and x, representing 74.02% of  $^{39}\text{Ar}$  released in 2 consecutive fractions, MSWD = 0.18

$t_p = 5.92 \pm 0.29$  Ma; groundmass sample; weighted mean of fractions j to l, representing 36.51% of  $^{39}\text{Ar}$  released in 3 consecutive fractions, MSWD = 0.4

Isochron age combining the groundmass and hornblende data

$t_c = 6.01 \pm 0.86$  Ma;  $(^{40}\text{Ar}/^{36}\text{Ar})_i = 296 \pm 13$ , MSWD = 1.8 for  $n = 8$  (j, k, l, r, s, t, w, x)

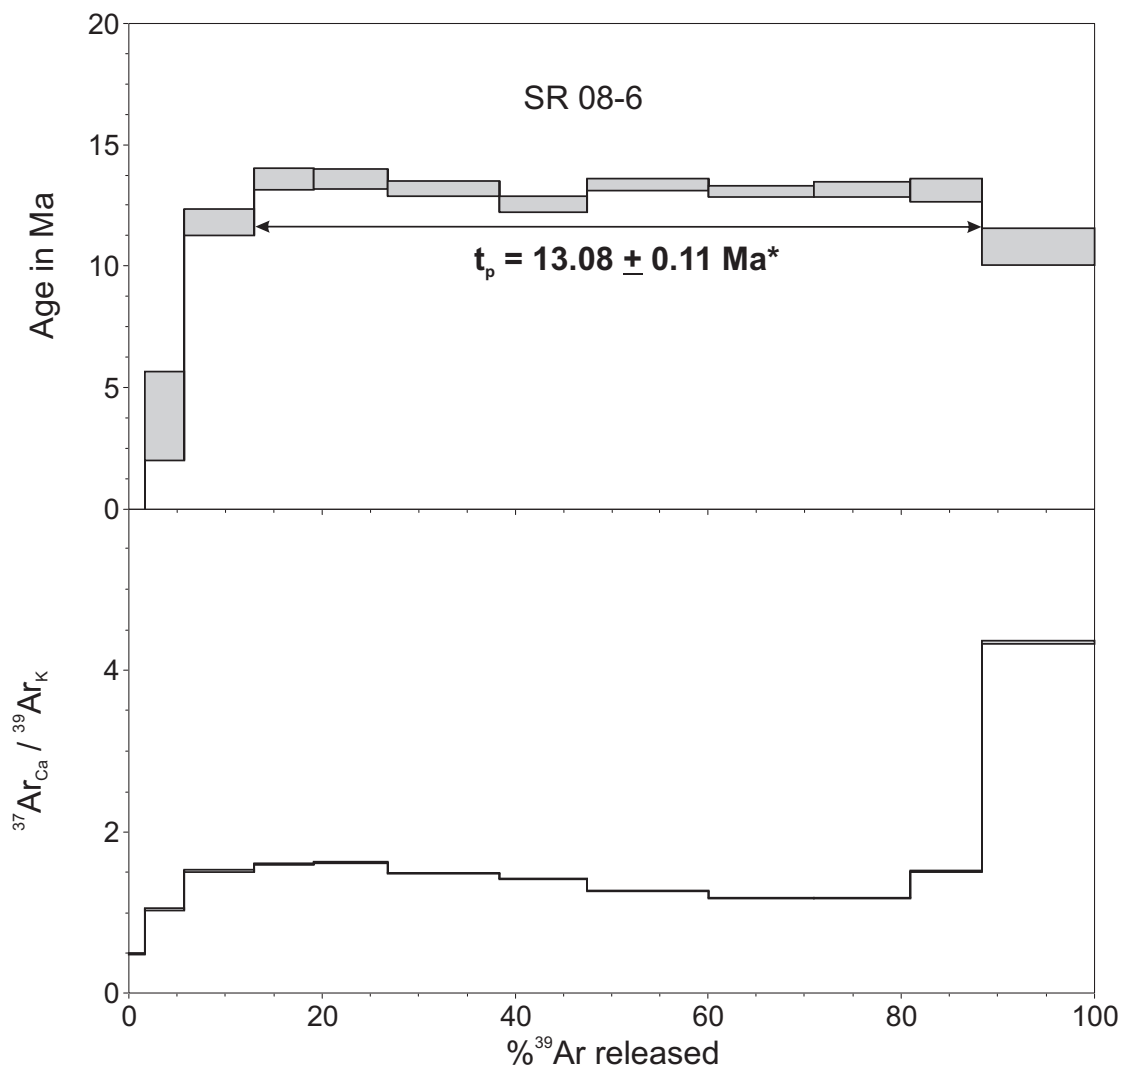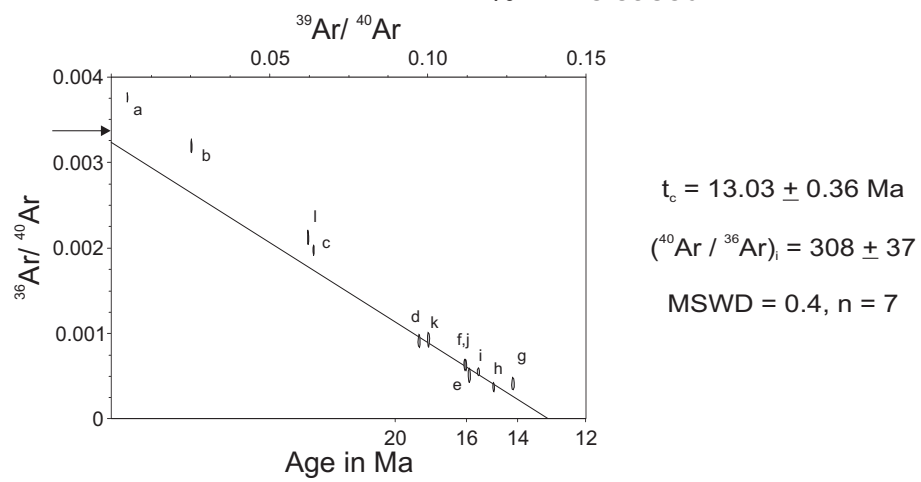

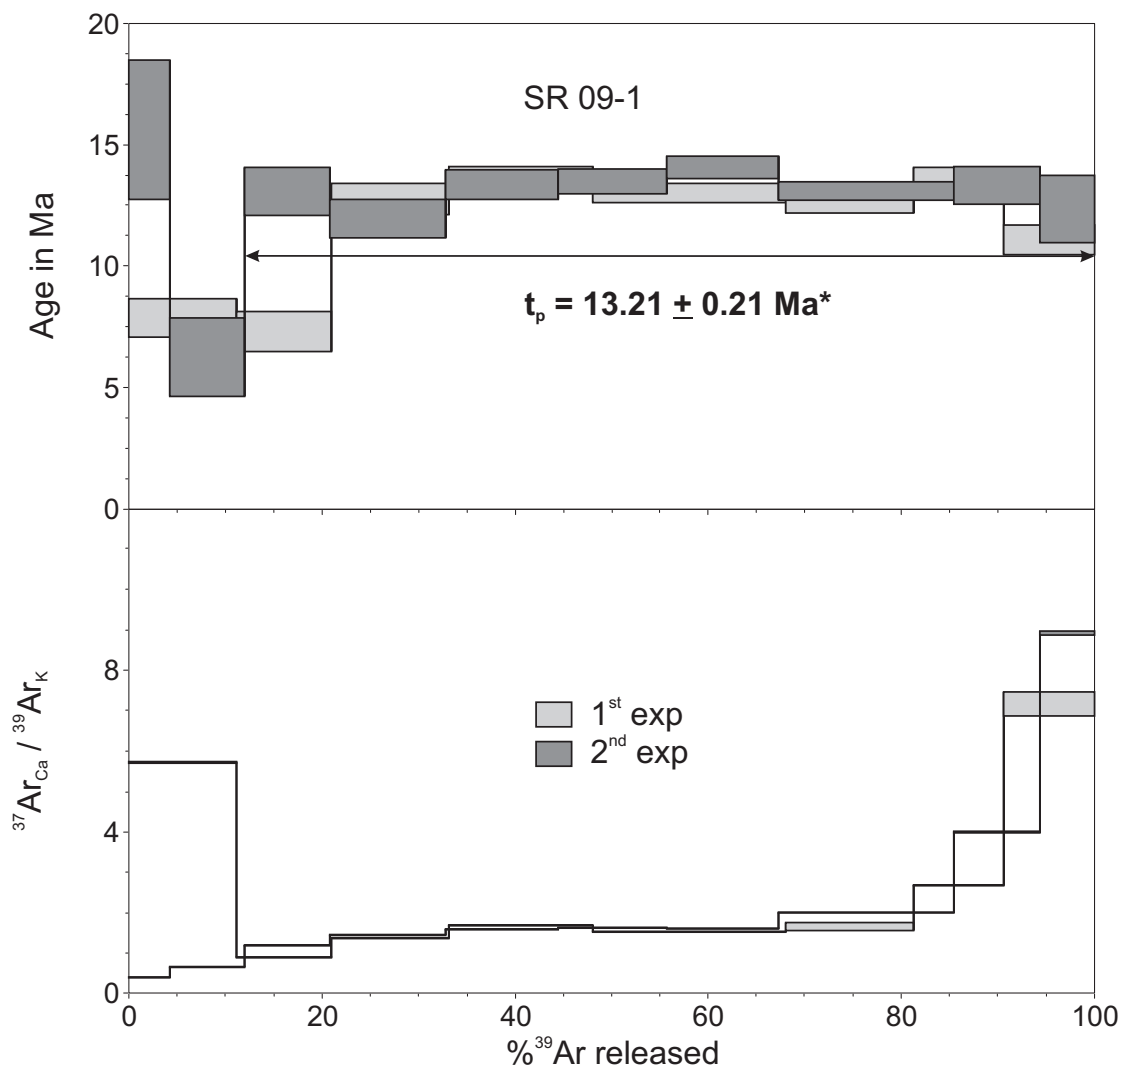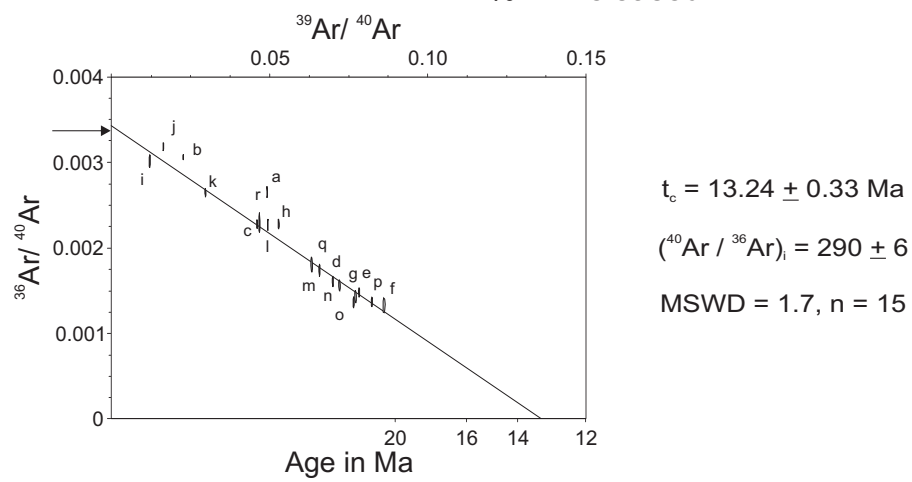

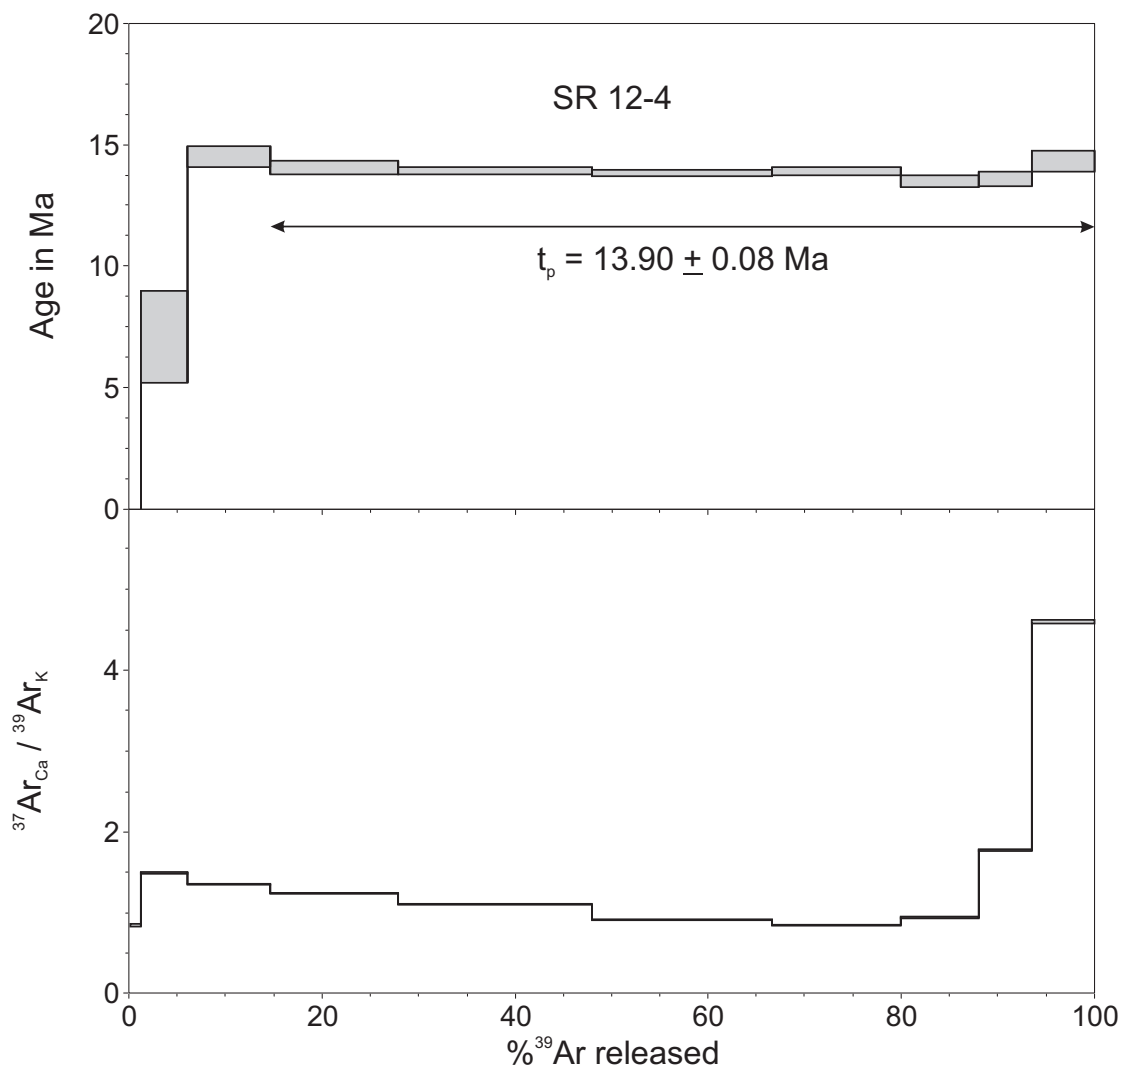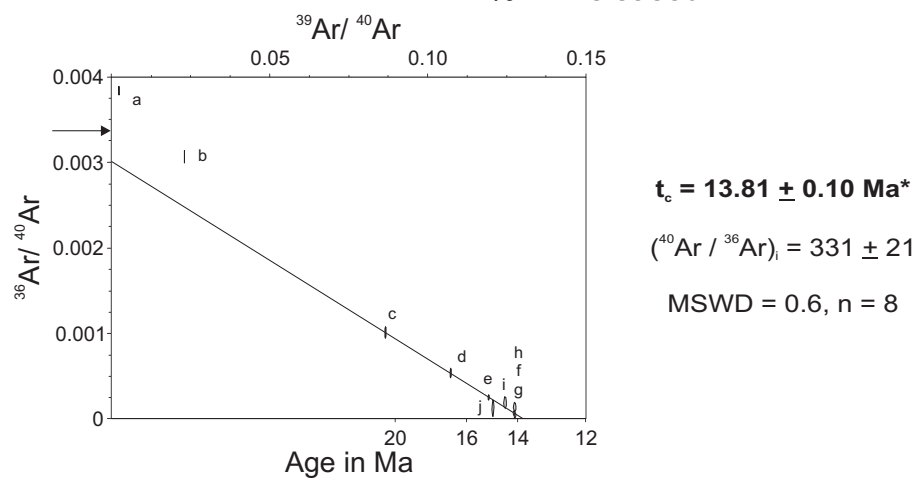

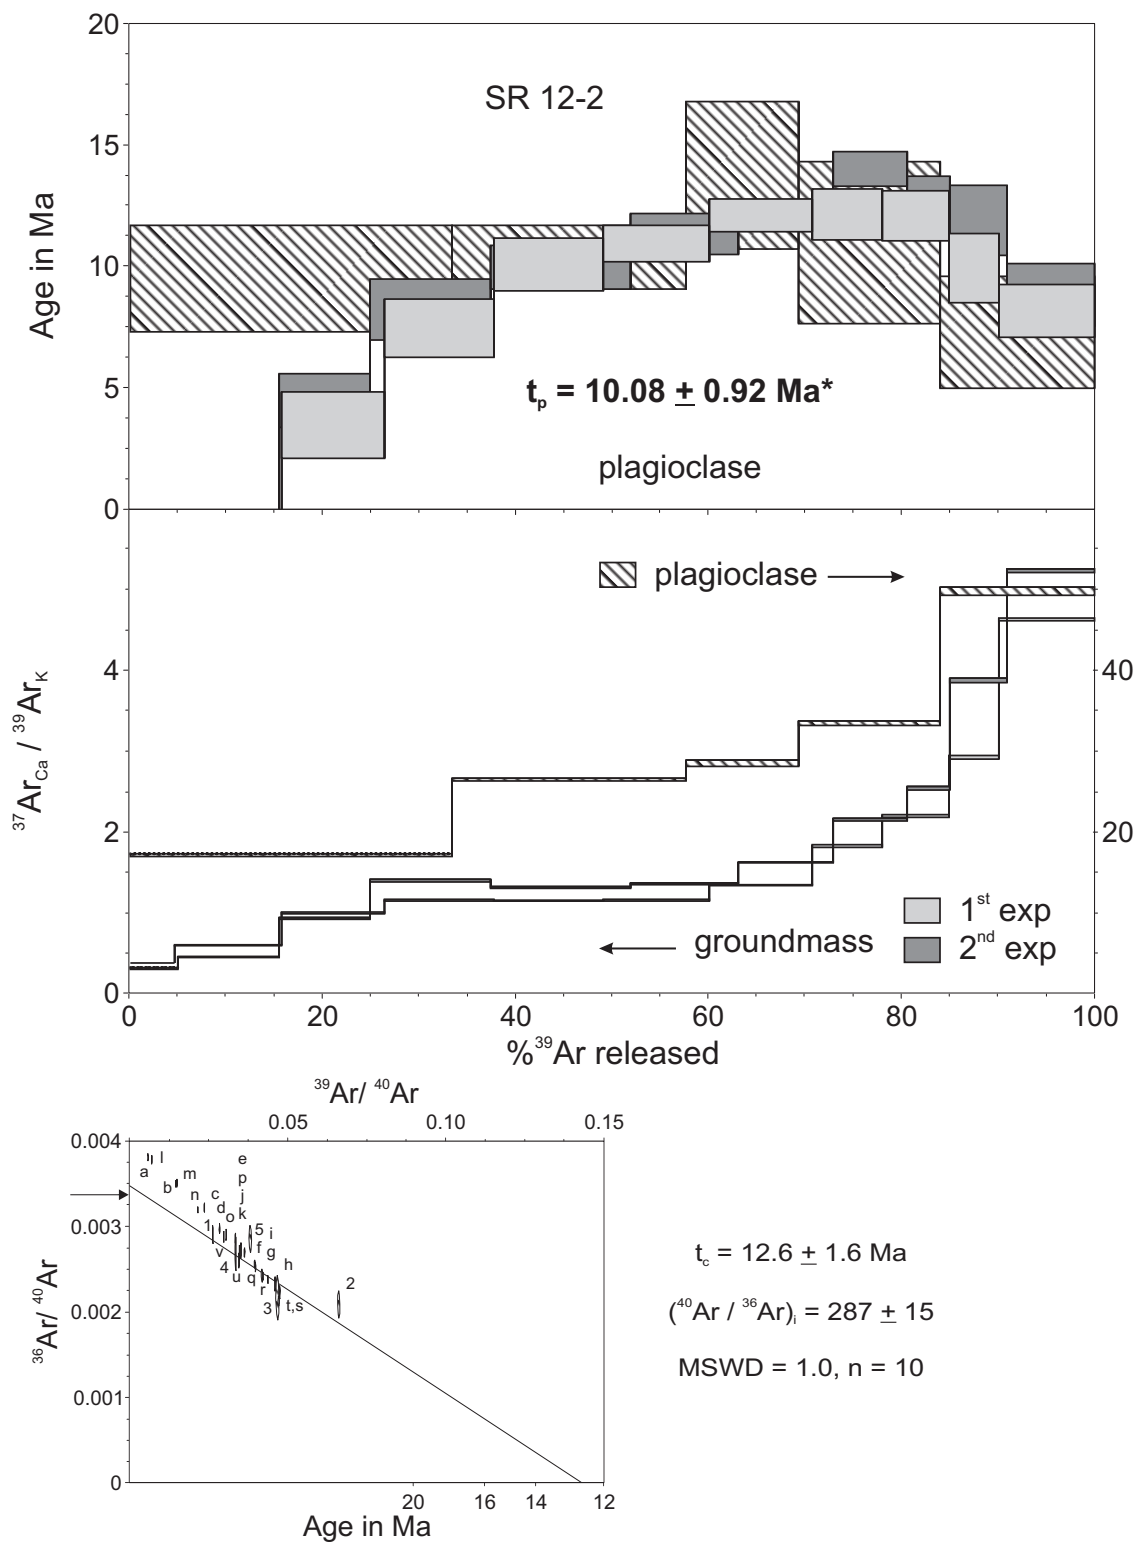

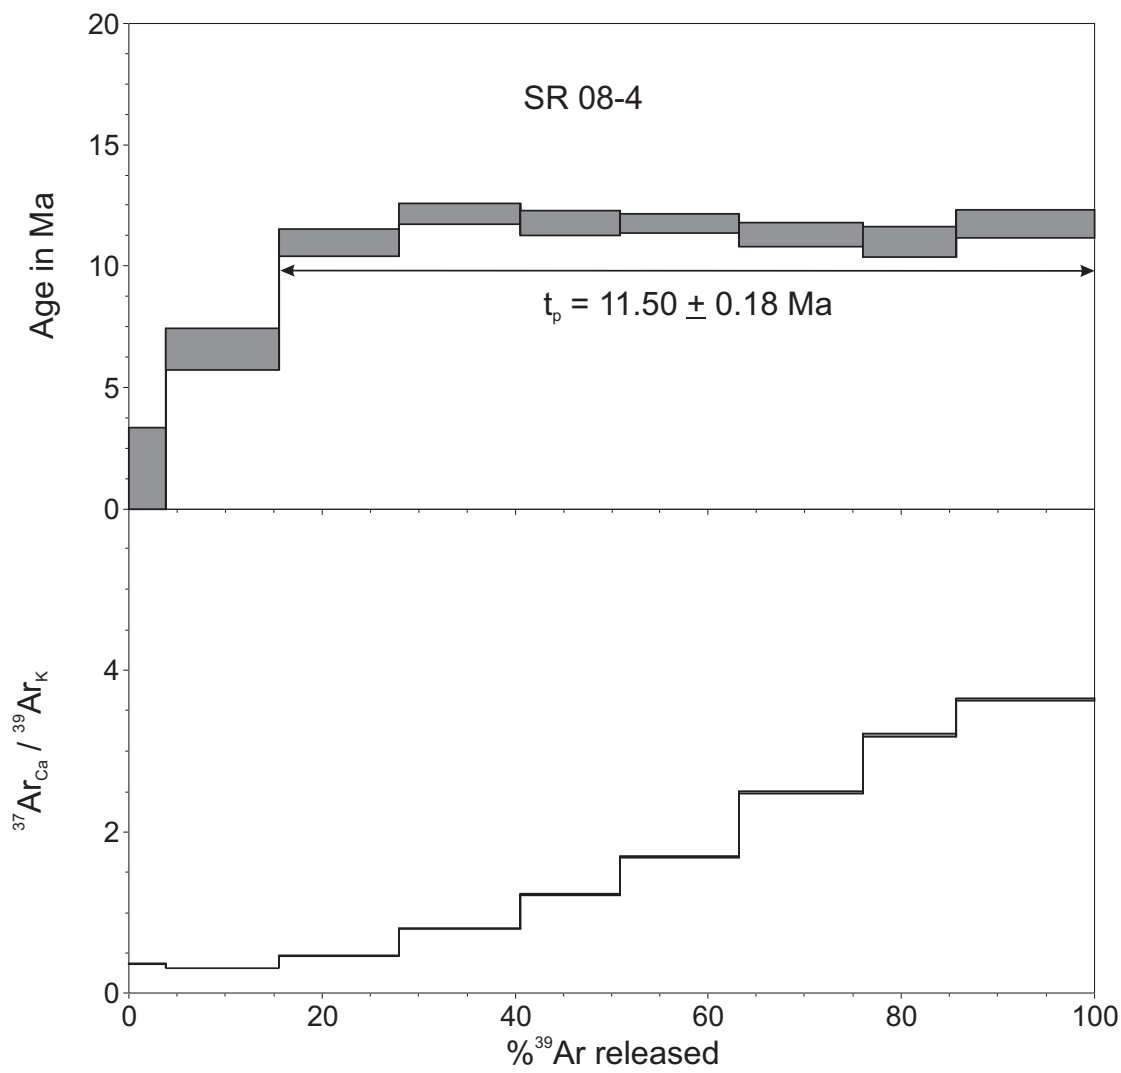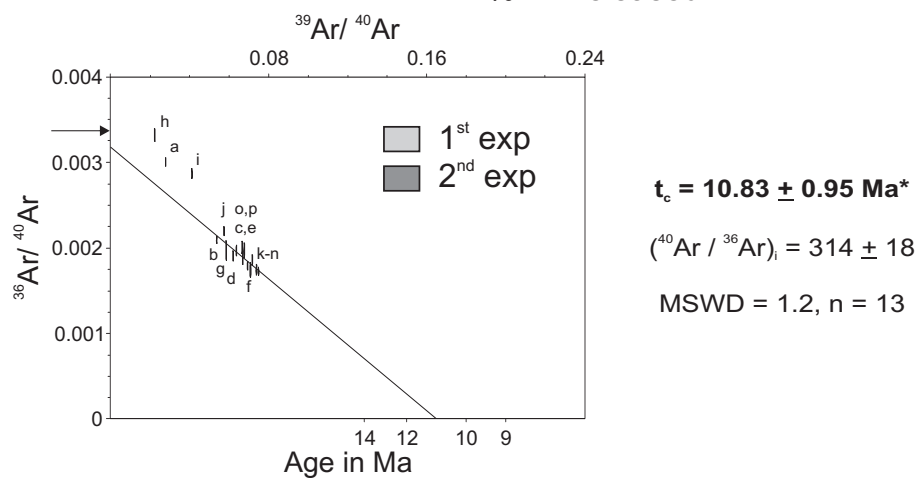

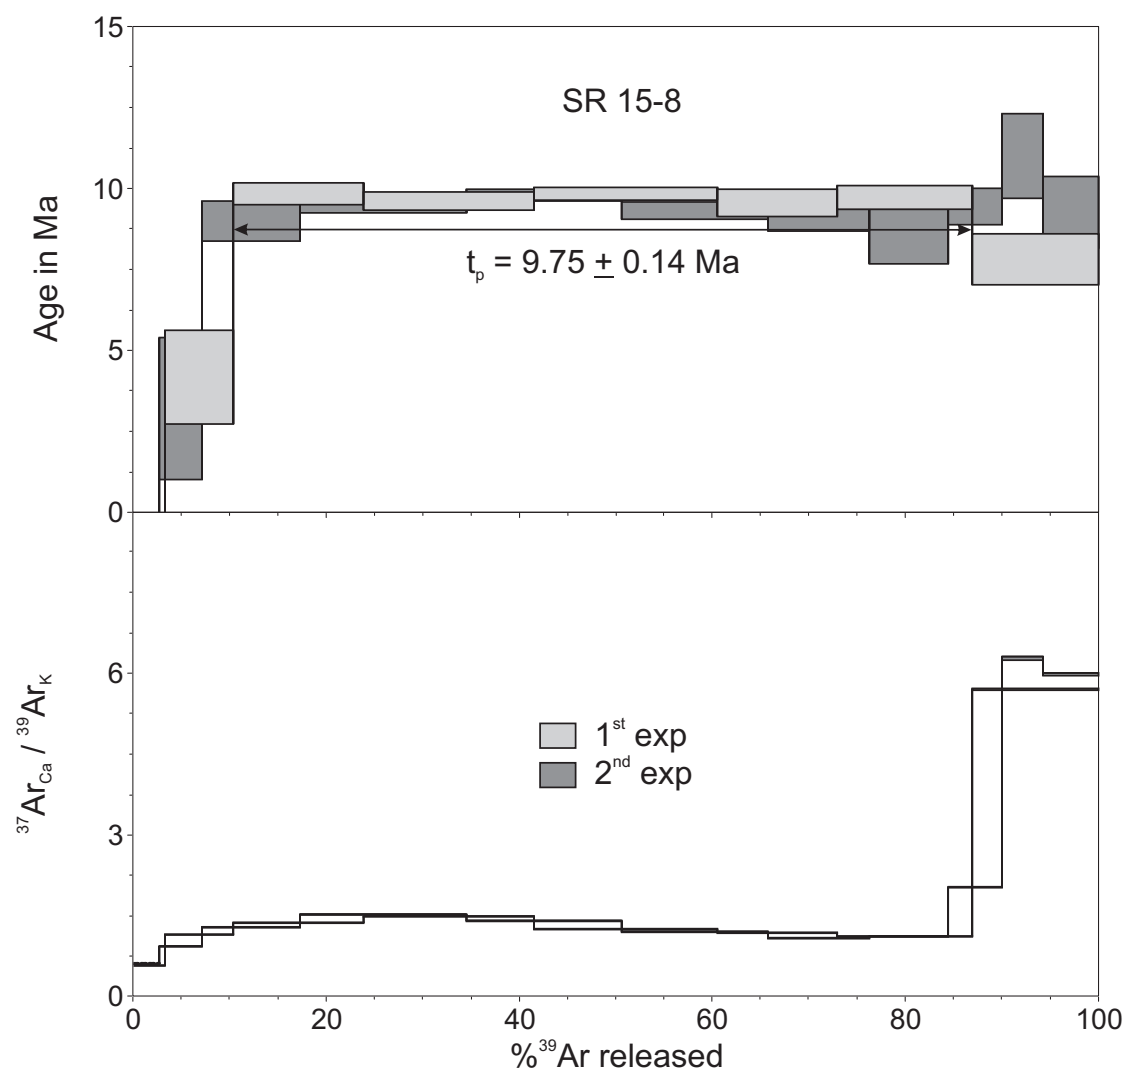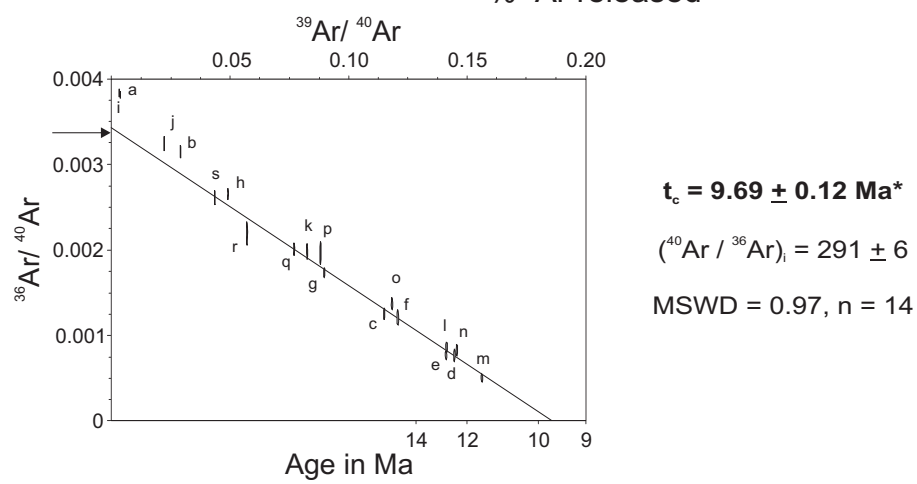

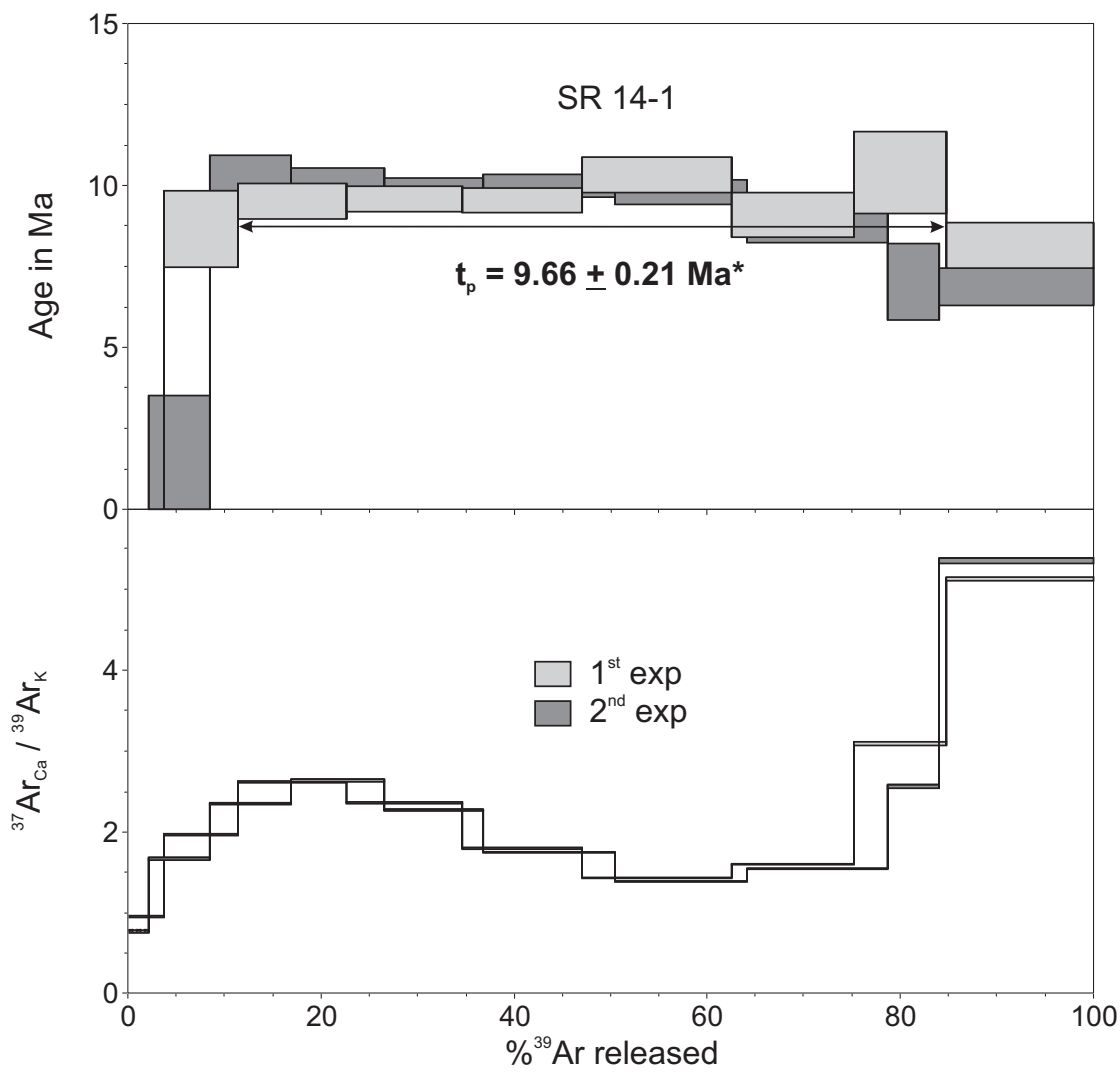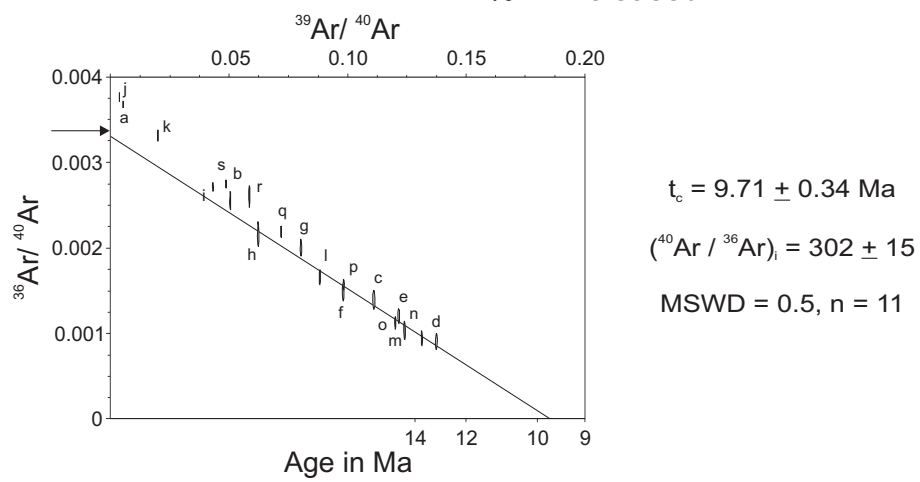

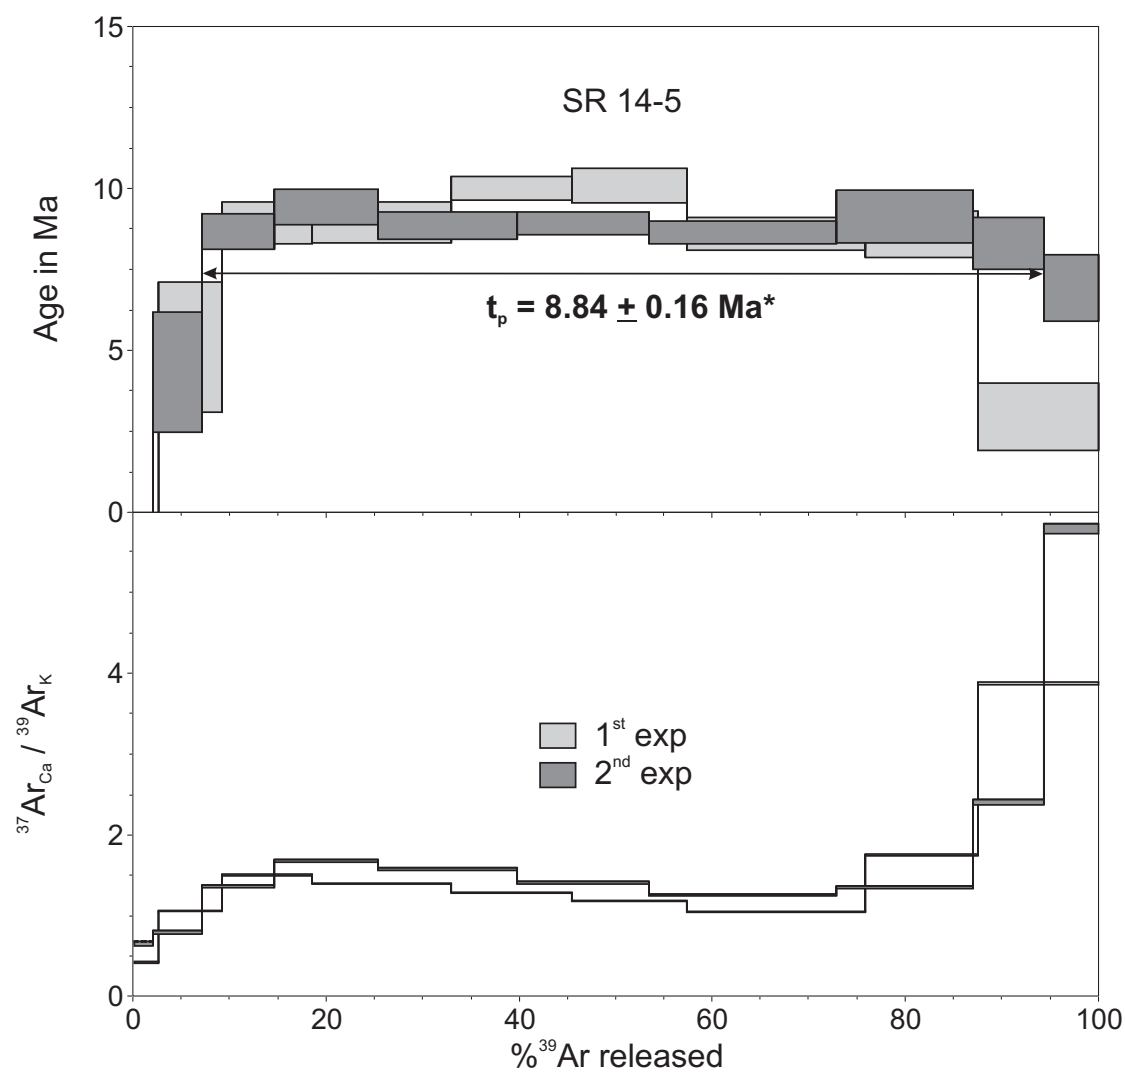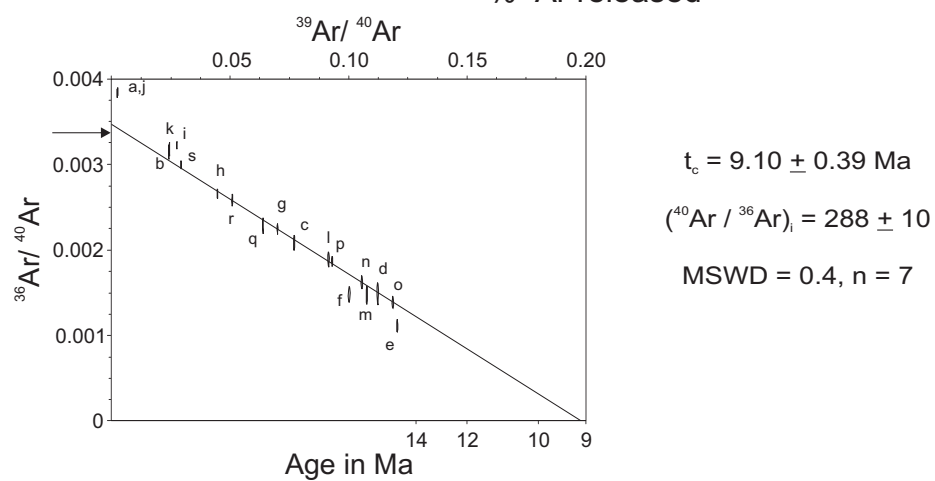

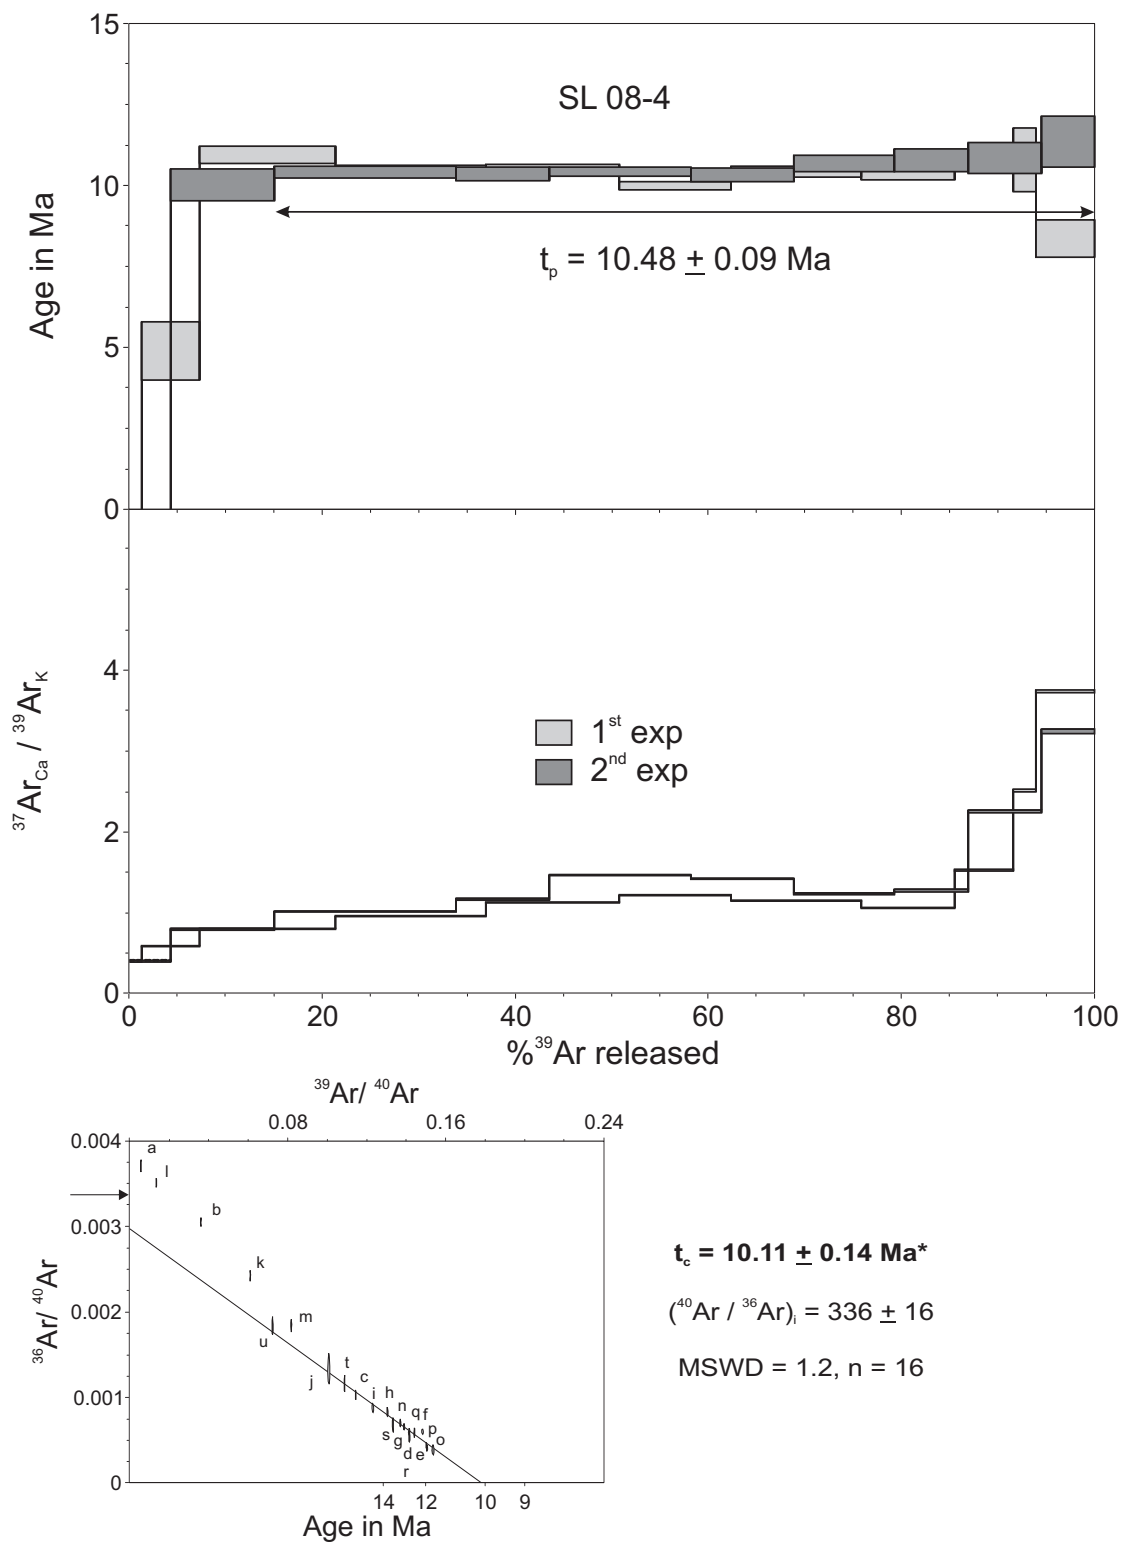

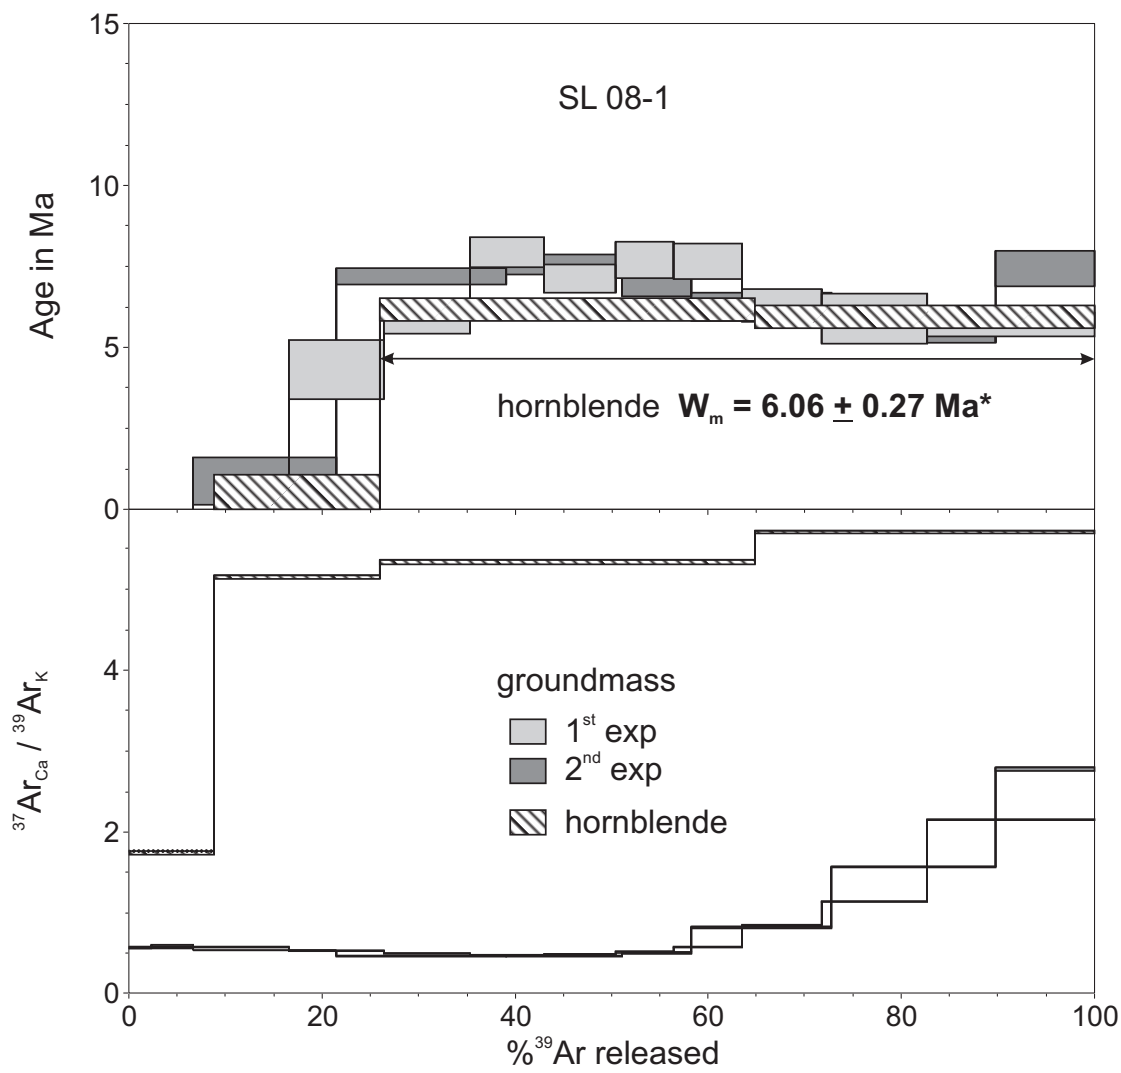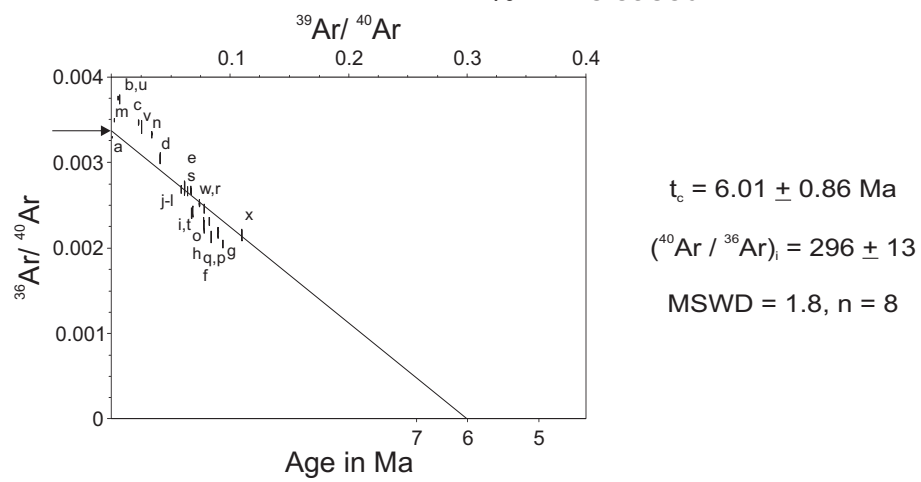

Supplement: Supplementary file 1 [file 23763530 › Supplemental Material 3.pdf]
