# Supplementary material
Source: publisher figshare collection journal article supplement (https://gsapubs.figshare.com/ndownloader/files/23763530)
Supplement: Supplementary file 1 [file 23763530]

Archive with 9 entries (9 files):
- Supplemental Material 1.pdf
- Supplemental Material 2.xlsx
- Supplemental Material 3.pdf
- Supplemental Material 4.xlsx
- Supplemental Material 5.xlsx
- Supplemental Material 6.pdf
- Supplemental Material 7.pdf
- Supplemental Material 8.pdf
- Supplemental Material 9.zip
