# Supplementary material
Source: publisher figshare collection journal article supplement (https://gsapubs.figshare.com/ndownloader/files/23763530)
Supplement: Supplementary file 1 [file 23763530 › Supplemental Material 2.xlsx]

## Sheet: XRF
Supplementary Data 2
Raw whole rock XRF and ICPMS geochemical analyses from the GeoAnalytical Lab at Western Washington University
Sample numbers reflect Year of collection, Month of collection, Day of collection, and order of collection
	SR 08-1	SR 08-2	SR 08-3	SR 08-4	SR 08-5	SR 08-6	SR 09-1	SR 09-2	SR 09-4	SR 09-5	SR 09-7	SR 10-1	SR 12-2	SR 12-4	SR 12-5	SR 12-6	SR 14-1	SR 14-2	SR 14-3	SR 14-4	SR 14-5	SR 15-4	SR 15-5	SR 15-6	SR 15-8	SR 17-1	SR 17-2	PEP	El Morro	Clast (El Morro)		SR 08-2	SR 08-2®			SL 08-1	SL 08-3	SL 08-4	SL 08-5	SL 08-7	SL 10-1	SL 10-3	SL 12-2	SL 12-3	SL 13-1	SL 13-4	SL 15-2	SL 16-4	Montado-02
Latitude	27.3147	27.3214	27.3014	27.3366	27.3345	27.3332	27.3402	27.3219	27.3419	27.3225	27.3228	27.3487	27.336740.	27.1717	27.1735	27.1756	27.3136	27.1792	27.3368	27.3017	27.3014	27.3228	27.337	27.3461	27.3131	27.3258	27.3231	27.3414	27.3266	27.3266		27.3214	27.3214		Latitutde	27.1912	27.1872	27.1772	27.1942	27.1923	27.1803	27.1864	27.347620.	27.3402	27.333220.	27.3444	27.34	27.18	27.3093
Longitude	-112.299	-112.242	-112.282	-112.337	-112.344	-112.345	-112.342	-112.242	-112.339	-112.242	-112.242	-112.335	-112.338	-112.238	-112.229	-112.224	-112.303	-112.249	-112.338	-112.283	-112.282	-112.242	-112.338	-112.336	-112.303	-112.314	-112.314	-112.339	-112.249	-112.249		-112.242	-112.242		Longitute	-112.234	-112.244	-112.26	-112.236	-112.24	-112.239	-112.228	-112.34	-112.342	-112.345	-112.338	-112.345	-112.249	-112.251
XRF
	Unnormalized Major Elements (Weight %):										Unnormalized Major Elements (Weight %):										Unnormalized Major Elements (Weight %):										Unnormalized Major Elements (Weight %):					Unnormalized Major Elements (Weight %):										Unnormalized Major Elements (Weight %):
SiO2	60.7075	47.4081	51.0925	54.7216	55.4003	56.1805	55.246	52.7666	54.5888	56.8283	60.1257	55.0893	55.7405	56.1748	58.0288	50.4016	55.517	56.1745	48.8903	64.3916	57.6568	67.3356	50.0064	45.6343	56.5438	63.7677	50.5124	59.1373	60.6748	78.7883		47.4081	47.4612		SiO2	56.8984	56.3549	58.7108	57.0635	56.425	56.5593	58.1643	61.5633	61.6591	60.8124	60.7529	58.1099	59.0164	61.9426
TiO2	0.741507	1.01814	1.2472	0.98748	0.958259	0.873376	0.867019	0.985208	0.983911	0.867662	0.730002	0.932987	0.86773	0.891462	0.885271	1.85424	1.44934	0.987948	1.22847	0.455666	1.25535	0.189873	0.166733	0.198529	1.44997	0.612739	1.44308	0.830524	0.259194	0.142857		1.01814	1.01318		TiO2	1.36866	1.42866	0.92581	1.24905	1.09844	0.873526	1.03459	0.65105	0.66965	0.64223	0.680556	0.793327	0.729156	0.330907
Al2O3	16.594	15.3166	17.4281	17.0273	17.3787	17.55	17.4201	17.199	17.0391	17.7441	16.527	17.3238	17.433	17.8954	16.597	16.5288	16.9551	18.8262	17.5665	14.4763	16.0752	12.274	9.93586	9.76845	18.7532	16.3717	16.369	16.7039	12.6435	9.19634		15.3166	15.3188		Al2O3	16.1579	16.231	17.2923	16.3258	16.8199	17.2214	16.4421	18.0276	17.2468	17.5909	17.214	17.2453	17.0316	12.6939
FeO*	5.22122	8.43875	6.52556	6.29218	6.20503	6.22303	6.37041	6.74019	6.74579	5.99632	5.1554	7.087	6.10823	5.26169	5.55496	7.6244	8.00044	6.04447	9.11721	3.12447	7.25098	1.7043	1.69515	2.15541	6.16252	4.31697	9.02837	5.69461	1.73187	1.07269		8.43875	8.55858		FeO*	5.59654	5.73449	5.2515	5.46351	5.67569	5.17848	6.19345	4.68656	4.45301	4.69353	4.65761	5.4336	5.07913	2.1238
MnO	0.091299	0.036407	0.0546	0.101985	0.119779	0.0752115	0.118248	0.226034	0.144514	0.0664657	0.104705	0.0690007	0.084201	0.0922545	0.100971	0.0672555	0.121992	0.095784	0.211867	0.0633262	0.128632	0.0392852	0.0292009	0.0373166	0.0941655	0.02691	0.133926	0.0997035	0.0158145	0.018876		0.036407	0.0354956		MnO	0.08833	0.0951687	0.08137	0.0853479	0.0839124	0.0789723	0.108643	0.07134	0.07326	0.07095	0.0762399	0.0903078	0.0869431	0.0434417
MgO	3.20076	3.89422	3.24068	4.0681	4.04177	3.49738	4.34512	4.97352	4.32947	3.33313	3.48524	3.70314	4.22422	3.06225	3.60786	3.20594	3.47915	3.14672	6.5844	1.56665	3.7879	0.589576	4.16319	3.93618	2.08805	1.25857	5.67529	3.4274	2.639	0.221344		3.89422	3.89177		MgO	3.98	3.49176	3.75693	3.44572	3.63484	3.46193	3.57746	1.04623	2.1333	2.34376	2.84295	4.01446	3.14546	1.30289
CaO	5.52836	4.96885	5.65917	6.73821	6.72234	6.95847	7.21228	6.98048	6.77899	6.29055	5.60867	7.43438	6.96669	6.94424	5.77127	7.11743	7.32761	7.87823	10.079	3.77862	6.28368	0.780849	0.886816	1.64562	7.28745	4.22166	7.53292	5.76518	1.49463	0.404801		4.96885	4.95576		CaO	6.65781	6.67228	6.3285	6.67975	6.98614	6.04781	5.8317	5.34934	5.03902	5.61826	5.64599	6.16203	5.50045	3.51581
Na2O	3.93136	2.49283	3.62844	3.84783	3.98492	4.24615	4.01391	3.92138	3.9104	4.37954	3.98227	3.70654	4.07566	4.32867	3.62951	3.64617	4.25061	4.16949	3.19937	4.23538	4.21692	7.30029	4.41344	7.24439	4.89397	4.02523	3.8168	3.94148	4.88708	3.6705		2.49283	2.50084		Na2O	4.4407	4.37998	4.47229	4.53488	4.37941	4.81341	3.90192	4.29642	4.4856	4.18333	4.49539	4.16665	4.01223	2.74747
K2O	2.07903	0.769339	0.688623	1.41986	1.47151	1.74189	1.30514	0.743018	1.29593	1.82804	1.93717	1.70758	1.5222	1.79912	1.97896	1.49953	1.21449	1.16555	0.384306	2.64616	1.6739	3.26574	2.96451	2.07264	1.40666	2.51708	0.859287	1.99363	2.3665	2.54425		0.769339	0.773063		K2O	2.96454	3.19315	1.54755	3.02643	2.07355	1.97364	1.99551	2.07446	1.48761	1.52946	1.42513	1.35017	1.36382	2.58433
P2O5	0.26091	0.176821	0.134725	0.350444	0.285967	0.204516	0.203063	0.272805	0.280595	0.230139	0.252525	0.222768	0.184197	0.237685	0.313853	0.827093	0.189491	0.153553	0.181935	0.10569	0.200031	0.0193193	0.0198114	0.0635742	0.24607	0.205783	0.253363	0.312955	0.0160387	0.014157		0.176821	0.17592		P2O5	0.61785	0.6445	0.31148	0.576249	0.400217	0.334412	0.439105	0.14067	0.12224	0.11942	0.21979	0.227007	0.255058	0.100545
Sum	98.3559	84.52	89.6996	95.555	96.5686	97.5505	97.1013	94.8083	96.0976	97.5642	97.9087	97.2765	97.2066	96.6876	96.4684	92.7725	98.5053	98.6425	97.4434	94.8439	98.5294	93.4989	74.2811	72.7564	98.9259	97.3243	95.6245	97.9067	86.7284	96.0742		84.52	84.6846		Sum+AZ18A1AJ18:AY19AJ18:BB19AJ18:BA19AJ19:BA19	98.7706	98.226	98.6785	98.4502	97.5771	96.5429	97.6889	97.907	97.3696	97.6043	98.0105	97.5928	96.2203	87.3857
LOI %	1.58432	14.3834	9.23306	3.60408	2.66364	1.5489	2.31379	4.62782	3.36696	1.7029	1.45975	2.25407	2.11656	2.03281	2.21031	5.39438	0.455946	0.739308	2.32072	3.76192	0.169492	5.99408	25.2562	26.8831	0.921427	2.13285	4.12135	1.58032	12.521	2.78846		14.3834	14.3834		LOI %	0.451303	1.16453	0.6586	0.535352	1.79555	2.4607	1.48814	1.68814	2.06503	1.9665	1.54639	1.43398	2.99335	11.6698
	Normalized Major Elements (Weight %):										Normalized Major Elements (Weight %):										Normalized Major Elements (Weight %):										Normalized Major Elements (Weight %):					Normalized Major Elements (Weight %):										Normalized Major Elements (Weight %):
SiO2	61.7222	56.0909	56.9596	57.2672	57.3688	57.5912	56.8952	55.6561	56.8056	58.2471	61.4099	56.6317	57.3423	58.0993	60.1532	54.3282	56.3594	56.9476	50.173	67.8922	58.5173	72.0176	67.3205	62.722	57.1577	65.5208	52.8237	60.4017	69.9595	82.0078		56.0909	56.0447		SiO2	57.6065	57.3727	59.4971	57.9618	57.8261	58.5847	59.5404	62.8794	63.3248	62.305	61.9861	59.5433	61.3347	70.8842
TiO2	0.753902	1.20462	1.39042	1.03342	0.99231	0.895306	0.892901	1.03916	1.02387	0.889324	0.745594	0.959108	0.892666	0.922003	0.917679	1.99869	1.47133	1.00154	1.2607	0.480438	1.27409	0.203076	0.224462	0.272869	1.46571	0.629585	1.50911	0.848281	0.298857	0.148695		1.20462	1.19642		TiO2	1.3857	1.45446	0.938208	1.26872	1.12572	0.904806	1.05907	0.664968	0.68774	0.657994	0.69437	0.812895	0.757799	0.378674
Al2O3	16.8714	18.1219	19.4294	17.8194	17.9963	17.9907	17.9401	18.1409	17.7311	18.187	16.88	17.8088	17.934	18.5085	17.2046	17.8165	17.2124	19.0853	18.0274	15.2633	16.3151	13.1275	13.376	13.4262	18.9568	16.8218	17.118	17.0611	14.5782	9.57212		18.1219	18.0892		Al2O3	16.359	16.5242	17.5238	16.5828	17.2375	17.8381	16.8311	18.413	17.7127	18.0227	17.5634	17.6707	17.7006	14.5263
FeO*	5.3085	9.98432	7.2749	6.58488	6.42551	6.37929	6.56058	7.10929	7.01973	6.14602	5.26552	7.28542	6.28376	5.44196	5.75831	8.21839	8.12184	6.12766	9.35641	3.29432	7.3592	1.8228	2.28207	2.96251	6.22943	4.43565	9.44149	5.81637	1.99689	1.11652		9.98432	10.1064		FeO*	5.6662	5.83805	5.32183	5.54952	5.81662	5.36392	6.33998	4.78675	4.57331	4.80873	4.75216	5.56762	5.27865	2.43037
MnO	0.0928251	0.043075	0.0608698	0.106729	0.124035	0.0771001	0.121778	0.238412	0.150383	0.0681251	0.106942	0.0709326	0.0866206	0.0954151	0.104667	0.0724951	0.123843	0.0971022	0.217426	0.0667689	0.130552	0.0420167	0.0393113	0.0512897	0.0951879	0.0276498	0.140054	0.101835	0.0182345	0.0196473		0.043075	0.041915		MnO	0.0894294	0.0968875	0.0824597	0.0866914	0.085996	0.0818002	0.111213	0.0728651	0.0752391	0.0726915	0.0777875	0.0925353	0.0903584	0.0497126
MgO	3.25426	4.60745	3.61281	4.25734	4.18538	3.5852	4.47483	5.24587	4.50528	3.41634	3.55968	3.80682	4.34561	3.16716	3.73994	3.4557	3.53194	3.19002	6.75715	1.65182	3.84444	0.630571	5.60465	5.41008	2.11072	1.29317	5.93498	3.50068	3.04284	0.230389		4.60745	4.5956		MgO	4.02954	3.55482	3.80724	3.49997	3.7251	3.5859	3.6621	1.0686	2.19093	2.40129	2.90066	4.11348	3.26902	1.49097
CaO	5.62077	5.8789	6.30903	7.05165	6.96121	7.1332	7.42758	7.36273	7.05428	6.4476	5.72847	7.64252	7.16689	7.18215	5.98255	7.67192	7.4388	7.98665	10.3434	3.98404	6.37747	0.835143	1.19386	2.26183	7.36658	4.33773	7.87761	5.88845	1.72334	0.421342		5.8789	5.85202		CaO	6.74068	6.79279	6.41325	6.7849	7.15962	6.26438	5.96967	5.4637	5.17515	5.75616	5.76059	6.31402	5.71652	4.02333
Na2O	3.99707	2.94939	4.0451	4.02682	4.12652	4.35278	4.13373	4.13612	4.0692	4.48888	4.06733	3.81031	4.19278	4.47697	3.76238	3.93023	4.31511	4.22687	3.28332	4.46563	4.27986	7.80789	5.94153	9.95705	4.94711	4.13589	3.99145	4.02575	5.63493	3.82049		2.94939	2.95312		Na2O	4.49597	4.45908	4.53218	4.60627	4.48816	4.98577	3.99423	4.38827	4.60678	4.28601	4.58664	4.26943	4.16984	3.14408
K2O	2.11378	0.910245	0.767699	1.48591	1.5238	1.78563	1.34411	0.783706	1.34856	1.87368	1.97855	1.75538	1.56594	1.86076	2.0514	1.61635	1.23292	1.18159	0.394389	2.79002	1.69888	3.49282	3.99093	2.84873	1.42193	2.58628	0.898606	2.03626	2.72863	2.64822		0.910245	0.912873		K2O	3.00144	3.25082	1.56827	3.07407	2.12503	2.04432	2.04272	2.11881	1.5278	1.567	1.45406	1.38348	1.41739	2.95739
P2O5	0.265271	0.209207	0.150196	0.366746	0.296129	0.209651	0.209125	0.287744	0.29199	0.235885	0.257919	0.229005	0.18949	0.245828	0.325342	0.891528	0.192367	0.155666	0.186708	0.111436	0.203017	0.0206626	0.0266709	0.0873795	0.248742	0.211441	0.264957	0.319647	0.0184931	0.0147355		0.209207	0.207735		P2O5	0.62554	0.65614	0.315651	0.585321	0.410155	0.346387	0.449493	0.143677	0.125542	0.122351	0.224251	0.232606	0.265078	0.115059
Total	100	100	100	100	100	100	100	100	100	100	100	100	100	100	100	100	100	100	100	100	100	100	100	100	100	100	100	100	100	100		100	100		Total	100	100	100	100	100	100	100	100	100	100	100	100	100	100
	Unnormalized Trace Elements (ppm):										Unnormalized Trace Elements (ppm):										Unnormalized Trace Elements (ppm):										Unnormalized Trace Elements (ppm):					Unnormalized Trace Elements (ppm):										Unnormalized Trace Elements (ppm):
Ni	35.7825	111.328	62.205	47.0925	45.24	45.825	40.6575	51.5775	53.82	31.1025	39.195	48.75	39.6825	42.4125	48.2625	55.38	10.53	13.9425	57.8175	13.65	28.7625	1.6405	3.281	10.229	16.185	7.02	69.3225	31.005	9.8475	0.8775		111.328	108.78		Ni	39.3	39.996	49.8	41.679	55.836	50.985	35.046	9.5	16.2	10.8	22.77	64.251	23.482	10.4475
Cr	60.1575	143.864	100.522	64.545	60.45	62.205	62.205	67.665	74.685	30.1275	68.3475	58.0125	63.0825	62.205	79.56	80.535	16.0875	18.72	68.835	23.4	27.3975	2.316	2.509	2.702	37.1475	12.09	124.02	67.275	8.2875	1.95		143.864	143.276		Cr	43.2	40.59	47.6	49.401	60.291	37.125	63.459	6	5.9	7.6	32.175	68.805	35.5215	26.467
Sc	14.3325	17.542	17.94	16.965	16.4775	19.2075	19.2075	16.77	18.525	16.8675	15.1125	20.865	19.0125	19.2075	15.5025	18.72	24.765	20.7675	30.7125	7.605	21.7425	4.5355	4.053	2.702	23.79	10.53	27.9825	15.015	3.51	2.73		17.542	18.032		Sc	13.4	12.969	12.7	13.365	15.048	11.781	15.246	12.4	11.3	13.5	12.078	15.642	12.4375	6.766
V	119.925	115.934	140.01	153.172	147.127	155.415	144.495	111.638	147.713	110.663	117.683	203.482	169.65	170.137	135.72	182.715	274.17	168.09	226.102	53.1375	180.96	17.2735	6.2725	33.4855	212.062	89.6025	180.57	127.237	20.9625	9.4575		115.934	116.718		V	167.8	180.081	130	136.125	162.162	120.384	130.779	184	82.4	116.7	94.347	132.264	109.748	43.6805
Ba	992.062	204.918	391.755	795.6	808.178	723.743	753.87	816.855	804.18	754.845	918.158	555.165	733.298	748.995	974.512	953.062	402.285	386.587	132.015	780.877	423.15	712.846	432.803	366.024	428.513	855.27	299.52	873.015	686.79	749.873		204.918	204.134		Ba	1349.9	1357.09	685.6	1313.14	844.272	787.545	869.814	741.2	838.9	668.9	632.412	503.91	751.623	821.372
Rb	44.265	15.288	11.9925	30.615	20.9625	28.86	15.21	11.895	17.4525	28.47	42.0225	26.6175	21.06	31.2	38.61	19.11	23.595	18.72	5.1675	58.2075	34.905	73.6295	44.969	32.617	24.765	50.0175	15.8925	46.215	49.725	51.675		15.288	15.582		Rb	24.402	27.742	20.874	25.511	21.34	13.58	45.978	30.968	24.598	24.5	26.772	18.624	38.9025	99.3525
Sr	560.332	574.182	659.977	724.815	721.402	809.835	820.365	762.158	706.387	787.215	558.09	798.623	846.983	817.83	670.507	691.86	495.885	590.167	512.362	331.987	398.775	88.4905	130.661	227.451	456.202	528.938	398.775	568.62	223.567	84.1425		574.182	574.182		Sr	1961.7	1981.68	1141.2	1997.13	1636.37	1639.44	586.872	670.8	584.9	648.3	1020.29	869.814	591.229	1870.7
Zr	201.727	137.494	172.672	164.482	155.708	127.335	126.653	156.097	154.635	131.528	196.852	140.79	128.213	133.965	214.793	278.07	117.585	106.957	104.032	163.703	180.18	281.105	228.512	210.274	193.148	197.925	182.13	215.377	155.22	214.305		137.494	137.984		Zr	210.917	219.693	159.862	186.829	163.614	122.308	251.652	94.4965	73.892	86.7825	124.017	110.449	181.396	178.871
Y	19.0125	18.228	11.31	20.5725	19.305	16.965	17.55	19.695	19.11	15.3075	19.7925	16.965	16.575	15.99	21.9375	33.15	21.645	17.0625	21.645	17.2575	24.57	36.284	25.5725	17.756	29.1525	15.99	27.5925	20.9625	10.92	25.935		18.228	17.934		Y	13	14.157	13.8	11.682	12.375	10.197	24.156	13.4	9.8	12.5	11.088	13.761	17.91	28.258
Nb	8.58	10.878	14.3325	10.725	8.8725	5.1675	5.1675	9.945	9.555	5.5575	8.775	5.7525	5.655	5.5575	12.7725	28.275	5.1675	4.095	3.0225	7.1175	6.7275	10.615	8.492	5.404	5.85	7.605	6.9225	10.8225	6.63	7.41		10.878	10.584		Nb	11.2	12.474	5.6	9.801	6.336	5.94	14.85	2.2	2.5	1.9	3.069	3.366	8.6565	8.358
Ga	18.525	17.052	17.8425	18.0375	18.33	19.5	19.7925	19.695	19.0125	20.085	18.4275	19.305	20.7675	19.5	18.8175	20.3775	19.5	18.33	16.8675	16.8675	19.0125	16.6945	12.738	12.2555	21.7425	19.695	18.0375	20.3775	13.9425	12.675		17.052	16.17		Ga	20.5	21.384	20.1	20.691	19.998	21.285	17.919	19.7	17.6	19.1	18.81	19.008	17.711	15.4225
Cu	26.0325	52.43	39.195	31.59	46.1175	84.3375	48.2625	126.653	35.0025	49.53	33.93	36.3675	63.18	27.3	92.7225	70.2	40.95	37.5375	50.895	23.8875	27.7875	4.1495	33.196	221.371	33.15	11.505	41.2425	35.5875	121.485	12.48		52.43	52.92		Cu	57.1	52.074	58.2	55.44	64.449	50.886	34.155	23.7	31.1	23.4	34.353	35.046	33.1335	14.6265
Zn	90.09	539.882	634.237	269.392	278.85	318.142	216.645	608.692	167.7	112.125	124.02	71.8575	138.742	512.167	237.12	404.82	73.8075	58.5	257.4	41.8275	72.735	43.618	101.325	129.02	184.178	150.93	229.71	136.11	84.5325	15.5025		539.882	543.9		Zn	80.9	79.299	67	71.28	78.606	73.161	85.833	51.7	55	67	62.469	68.211	83.8785	31.243
Pb	10.0425	14.7	26.13	7.1175	10.6275	13.26	8.97	24.6675	6.3375	7.8975	9.2625	5.46	8.2875	10.8225	9.8475	12.09	4.1925	8.19	6.5325	7.8	4.7775	4.825	11.0975	6.948	6.825	8.19	3.4125	10.92	14.3325	6.24		14.7	14.896		Pb	12.3	11.088	7.1	9.405	7.227	8.811	10.494	6.6	5.7	7.2	7.722	4.95	7.6615	3.781
La	25.155	16.954	13.3575	24.8625	20.1825	18.8175	16.8675	21.45	24.765	18.915	25.155	19.89	20.865	18.2325	27.105	40.365	9.75	14.235	8.97	19.11	17.745	22.4845	16.5015	19.3965	16.4775	22.3275	12.9675	25.74	21.06	19.7925		16.954	20.482		La	42.1	44.649	25.9	39.699	31.482	24.354	31.185	8.5	5.5	11.2	11.484	11.484	19.0045	21.492
Ce	48.8475	33.222	23.985	47.2875	44.5575	36.3675	33.4425	47.6775	46.5075	36.5625	51.3825	36.9525	38.415	36.66	52.65	77.5125	23.4	21.1575	25.935	34.2225	33.6375	47.864	34.4505	31.7485	32.8575	48.6525	28.5675	52.455	31.2	42.0225		33.222	31.262		Ce	86.4	94.644	48.7	82.368	60.291	47.025	63.162	19.9	14	19.3	28.908	29.601	45.6705	40.198
Th	3.8025	2.156	1.56	2.73	3.315	2.4375	2.34	2.73	2.535	2.0475	3.51	2.4375	2.925	2.34	4.1925	3.12	2.34	2.73	1.365	6.5325	3.705	8.878	6.948	4.5355	2.6325	3.51	1.2675	4.9725	6.825	6.63		2.156	1.862		Th	4.2	5.445	4.6	5.445	3.96	2.475	3.96	2.9	1.8	1.5	3.96	2.178	3.0845	8.955
Nd	22.5225	20.482	13.065	25.2525	24.375	19.7925	19.11	23.8875	23.79	19.5	24.18	19.305	18.2325	18.4275	24.2775	42.9	15.795	13.1625	18.135	18.0375	17.2575	23.0635	17.0805	16.598	20.7675	22.5225	19.5975	25.545	10.92	20.28		20.482	19.698		Nd	42.5	45.54	25.1	40.293	28.611	23.364	31.68	12.8	9	11	16.731	16.929	22.089	17.512
U	1.2675	2.744	3.12	1.4625	0.975	1.95	0.8775	2.2425	2.34	0.39	2.145	1.56	2.535	1.4625	2.2425	2.6325	2.145	2.34	1.365	2.145	2.925	1.93	1.6405	2.123	1.17	1.755	0.2925	0.8775	3.2175	2.8275		2.744	0.882		U	2.7	0.99	1.2	2.871	1.485	0.396	3.069	1.4	0.9	0.6	1.683	1.881	1.2935	4.179
sum tr.	2302.46	2049.28	2355.21	2456.32	2451.05	2509.16	2371.69	2901.99	2334.05	2178.73	2276.04	2088.16	2357.16	2694.41	2681.15	3014.89	1583.6	1521.29	1549.18	1627.37	1526.75	1402.24	1122.1	1352.64	1746.62	2064.08	1687.82	2288.13	1482.98	1286.81		2049.28	2049.28		sum tr.	4183.52	4241.59	2524.94	4112.15	3273.75	3051.04	2319.31	1912.16	1790.99	1751.78	2165.14	1990.17	2004.43	3251.68
in %	0.230246	0.204928	0.235521	0.245632	0.245105	0.250916	0.237169	0.290199	0.233405	0.217873	0.227604	0.208816	0.235716	0.269441	0.268115	0.30149	0.15836	0.152129	0.154918	0.162737	0.152675	0.140224	0.11221	0.135264	0.174661	0.206408	0.168782	0.228813	0.148298	0.128681		0.204928	0.204928		in %	0.418352	0.424159	0.252494	0.411215	0.327375	0.305104	0.231931	0.191216	0.179099	0.175178	0.216514	0.199017	0.200443	0.325168
sum m+tr	98.5862	84.725	89.9351	95.8006	96.8137	97.8014	97.3385	95.0985	96.331	97.7821	98.1363	97.4853	97.4423	96.957	96.7366	93.074	98.6637	98.7946	97.5983	95.0066	98.6821	93.6391	74.3933	72.8917	99.1006	97.5307	95.7932	98.1355	86.8767	96.2028		84.725	84.8896		sum m+tr	99.189	98.6501	98.931	98.8614	97.9044	96.848	97.9208	98.0982	97.5487	97.7795	98.227	97.7918	96.4207	87.7108
M+Toxides	98.632	84.7765	89.9911	95.8526	96.8652	97.8547	97.388	95.16	96.3802	97.8254	98.1827	97.5319	97.4921	97.0149	96.7924	93.1403	98.7024	98.8288	97.6399	95.037	98.7182	93.666	74.4162	72.9212	99.1429	97.5707	95.8377	98.183	86.9042	96.2257		84.7765	84.9411		M+Toxides	99.2684	98.731	98.9825	98.9385	97.9702	96.9073	97.9693	98.1365	97.5809	97.8134	98.2696	97.8346	96.4613	87.7702
w/LOI	100.216	99.1599	99.2242	99.4567	99.5288	99.4036	99.7018	99.7879	99.7472	99.5283	99.6424	99.786	99.6087	99.0477	99.0027	98.5347	99.1583	99.5681	99.9607	98.7989	98.8877	99.66	99.6724	99.8044	100.064	99.7035	99.9591	99.7633	99.4252	99.0142		99.1599	99.3245		w/LOI	99.7197	99.8955	99.6411	99.4739	99.7657	99.368	99.4574	99.8246	99.646	99.7799	99.816	99.2685	99.4546	99.44
if Fe3+	100.796	100.097	99.9485	100.155	100.218	100.094	100.409	100.536	100.496	100.194	100.215	100.573	100.287	99.6317	99.6193	99.381	100.046	100.239	100.973	99.1457	99.6926	99.8492	99.8606	100.044	100.748	100.183	100.961	100.395	99.6174	99.1333		100.097	100.275		if Fe3+	100.341	100.532	100.224	100.08	100.396	99.9428	100.145	100.345	100.14	100.301	100.333	99.8717	100.018	99.6757
	Major elements are normalized on a volatile-free basis, with total Fe expressed as FeO.										Major elements are normalized on a volatile-free basis, with total Fe expressed as FeO.										Major elements are normalized on a volatile-free basis, with total Fe expressed as FeO.										Major elements are normalized on a volatile-free basis, with total Fe expressed as FeO.					Major elements are normalized on a volatile-free basis, with total Fe expressed as FeO.										Major elements are normalized on a volatile-free basis, with total Fe expressed as FeO.
	® denotes a duplicate bead made from the same rock powder.										® denotes a duplicate bead made from the same rock powder.										® denotes a duplicate bead made from the same rock powder.										® denotes a duplicate bead made from the same rock powder.					® denotes a duplicate bead made from the same rock powder.										® denotes a duplicate bead made from the same rock powder.
NiO	45.5342	141.668	79.1575	59.9264	57.5691	58.3135	51.7377	65.6337	68.4873	39.5787	49.8767	62.0356	50.497	53.971	61.4153	70.4725	13.3997	17.7422	73.5743	17.37	36.601	2.08758	4.17516	13.0167	20.5958	8.93313	88.2147	39.4547	12.5312	1.11664		141.668	138.425		NiO	50.0103	50.8959	63.3718	53.0376	71.0528	64.8797	44.5969	12.089	20.6149	13.7433	28.9754	81.7611	29.8815	13.2947
Cr2O3	87.9246	210.268	146.921	94.3373	88.3521	90.9172	90.9172	98.8974	109.158	44.0336	99.8949	84.7896	92.1997	90.9172	116.283	117.708	23.5131	27.3607	100.607	34.2008	40.0435	3.38501	3.66709	3.94917	54.2938	17.6704	181.264	98.3274	12.1128	2.85007		210.268	209.408		Cr2O3	63.14	59.3253	69.5709	72.2032	88.1198	54.2609	92.75	8.76944	8.62329	11.108	47.0261	100.564	51.9173	38.6835
Sc2O3	21.984	26.9069	27.5174	26.0219	25.2741	29.4615	29.4615	25.7228	28.4147	25.8723	23.1804	32.0039	29.1624	29.4615	23.7786	28.7138	37.9859	31.8543	47.1085	11.665	33.3498	6.9568	6.21672	4.14448	36.4904	16.1515	42.9211	23.0308	5.38383	4.18743		26.9069	27.6585		Sc2O3	20.5537	19.8926	19.48	20.5	23.0815	18.0703	23.3852	19.0198	17.3326	20.707	18.5259	23.9926	19.0773	10.3781
V2O3	176.425	170.553	205.972	225.336	216.443	228.635	212.57	164.233	217.303	162.798	173.126	299.348	249.576	250.293	199.661	268.796	403.338	247.281	332.625	78.1719	266.215	25.4115	9.22763	49.2613	311.97	131.816	265.641	187.182	30.8384	13.9132		170.553	171.707		V2O3	246.855	264.921	191.246	200.257	238.56	177.1	192.392	270.687	121.221	171.68	138.796	194.577	161.454	64.2594
BaO	1107.64	228.791	437.394	888.287	902.33	808.058	841.695	912.018	897.866	842.784	1025.12	619.841	818.726	836.252	1088.04	1064.09	449.151	431.625	147.395	871.849	472.447	795.891	483.224	408.666	478.434	954.908	334.414	974.721	766.8	837.232		228.791	227.915		BaO	1507.16	1515.19	765.472	1466.12	942.629	879.293	971.147	827.549	936.631	746.826	706.087	562.615	839.186	917.062
Rb2O	48.4082	16.719	13.115	33.4806	22.9246	31.5613	16.6337	13.0084	19.0861	31.1348	45.9558	29.1089	23.0312	34.1203	42.2239	20.8987	25.8035	20.4722	5.65118	63.6557	38.1721	80.5212	49.1781	35.67	27.083	54.6991	17.38	50.5407	54.3793	56.5118		16.719	17.0405		Rb2O	26.686	30.3387	22.8278	27.8988	23.3374	14.8511	50.2815	33.8666	26.9004	26.7932	29.2779	20.3672	42.5438	108.652
SrO	662.653	679.031	780.494	857.171	853.135	957.716	970.169	901.333	835.379	930.966	660.001	944.456	1001.65	967.171	792.947	818.198	586.437	697.936	605.923	392.611	471.594	104.649	154.521	268.984	539.508	625.525	471.594	672.454	264.392	99.5075		679.031	679.031		SrO	2319.92	2343.55	1349.59	2361.82	1935.18	1938.81	694.039	793.293	691.707	766.684	1206.61	1028.65	699.191	2212.3
ZrO2	272.494	185.727	233.246	222.183	210.33	172.004	171.082	210.857	208.881	177.667	265.908	190.179	173.189	180.96	290.142	375.617	158.834	144.478	140.527	221.129	243.387	379.716	308.674	284.037	260.904	267.357	246.021	290.932	209.671	289.483		185.727	186.389		ZrO2	284.907	296.761	215.942	252.369	221.01	165.214	339.932	127.646	99.8133	117.226	167.522	149.195	245.03	241.619
Y2O3	24.1449	23.1487	14.3631	26.1261	24.5164	21.5447	22.2876	25.0117	24.2688	19.4398	25.1355	21.5447	21.0494	20.3065	27.8596	42.0989	27.4881	21.6685	27.4881	21.9162	31.2027	46.0789	32.4758	22.5493	37.0222	20.3065	35.0411	26.6213	13.8679	32.9362		23.1487	22.7753		Y2O3	16.5094	17.9787	17.5253	14.8356	15.7156	12.9497	30.6769	17.0173	12.4455	15.8744	14.0812	17.4758	22.7448	35.8863
Nb2O5	12.2741	15.5614	20.5033	15.3426	12.6925	7.39233	7.39233	14.2267	13.6688	7.95024	12.553	8.2292	8.08972	7.95024	18.2716	40.4486	7.39233	5.85807	4.32382	10.1819	9.62398	15.1852	12.1482	7.73065	8.36867	10.8793	9.90293	15.482	9.4845	10.6003		15.5614	15.1409		Nb2O5	16.0221	17.8446	8.01104	14.0207	9.06392	8.49742	21.2436	3.14719	3.57636	2.71803	4.39034	4.81521	12.3835	11.9565
Ga2O3	24.9019	22.9219	23.9845	24.2466	24.6398	26.2126	26.6058	26.4747	25.5573	26.9989	24.7709	25.9504	27.9164	26.2126	25.2951	27.3921	26.2126	24.6398	22.6739	22.6739	25.5573	22.4413	17.1229	16.4743	29.227	26.4747	24.2466	27.3921	18.742	17.0382		22.9219	21.7363		Ga2O3	27.5568	28.7451	27.0191	27.8135	26.882	28.612	24.0873	26.4814	23.6585	25.6749	25.285	25.5512	23.8077	20.7315
CuO	32.5871	65.6311	49.0638	39.5439	57.7292	105.573	60.4143	158.542	43.8156	62.001	42.4731	45.5243	79.0878	34.1738	116.069	87.8754	51.2606	46.9889	63.7097	29.902	34.784	5.19429	41.5543	277.109	41.4967	14.4018	51.6268	44.5479	152.073	15.6223		65.6311	66.2445		CuO	71.477	65.1855	72.854	69.399	80.6764	63.6984	42.7548	29.6673	38.9305	29.2918	43.0026	43.8701	41.4761	18.3092
ZnO	112.14	672.024	789.474	335.329	347.101	396.011	269.671	757.676	208.746	139.569	154.375	89.4454	172.701	637.526	295.158	503.904	91.8727	72.8185	320.401	52.0652	90.5377	54.294	126.125	160.6	229.257	187.872	285.934	169.424	105.223	19.2969		672.024	677.025		ZnO	100.701	98.7083	83.399	88.7265	97.8457	91.0679	106.842	64.3541	68.4618	83.399	77.7589	84.9064	104.409	38.8901
PbO	10.818	15.8352	28.1479	7.66714	11.4482	14.284	9.6627	26.5724	6.82691	8.50737	9.97779	5.88164	8.92749	11.6583	10.608	13.0236	4.51626	8.82246	7.03696	8.40235	5.14644	5.1976	11.9545	7.48455	7.35205	8.82246	3.67603	11.7633	15.4393	6.72188		15.8352	16.0463		PbO	13.2499	11.9443	7.64829	10.1313	7.7851	9.49142	11.3044	7.10968	6.14018	7.75601	8.31832	5.33226	8.25315	4.07298
La2O3	29.5011	19.8832	15.6653	29.1581	23.6695	22.0687	19.7818	25.156	29.0437	22.183	29.5011	23.3265	24.4699	21.3826	31.788	47.339	11.4345	16.6944	10.5198	22.4117	20.8109	26.3692	19.3525	22.7477	19.3244	26.1851	15.2079	30.1872	24.6986	23.2121		19.8832	24.0208		La2O3	49.3738	52.3632	30.3748	46.5579	36.9213	28.5617	36.5729	9.96858	6.45026	13.1351	13.4681	13.4681	22.288	25.2053
CeO2	60.0459	40.8382	29.4836	58.1283	54.7724	44.7049	41.1093	58.6077	57.1695	44.9446	63.1621	45.424	47.2218	45.0644	64.7202	95.2825	28.7645	26.0079	31.8807	42.0681	41.349	58.837	42.3484	39.0269	40.3902	59.8062	35.1167	64.4805	38.3527	51.6563		40.8382	38.4289		CeO2	106.207	116.341	59.8646	101.251	74.1129	57.8056	77.6421	24.4621	17.2095	23.7246	35.5352	36.3871	56.1406	49.4135
ThO2	4.1958	2.379	1.72135	3.01237	3.65787	2.68961	2.58203	3.01237	2.7972	2.25928	3.87304	2.68961	3.22754	2.58203	4.62614	3.44271	2.58203	3.01237	1.50618	7.20817	4.08821	9.79626	7.66664	5.00461	2.90478	3.87304	1.3986	5.48681	7.53092	7.31575		2.379	2.05459		ThO2	4.63441	6.00818	5.07578	6.00818	4.36959	2.73099	4.36959	3.19995	1.98618	1.65515	4.36959	2.40327	3.40353	9.88123
Nd2O3	26.27	23.89	15.2389	29.4542	28.4307	23.0858	22.2897	27.8621	27.7484	22.7446	28.2033	22.5171	21.2662	21.4936	28.317	50.0381	18.4231	15.3526	21.1525	21.0387	20.129	26.901	19.9225	19.3597	24.223	26.27	22.8583	29.7954	12.737	23.6544		23.89	22.9755		Nd2O3	49.5715	53.1174	29.2764	46.9973	33.3716	27.2515	36.9512	14.9298	10.4975	12.8303	19.5149	19.7458	25.7644	20.4258
U2O3	1.3953	3.02067	3.43458	1.60996	1.07331	2.14661	0.965976	2.46861	2.57594	0.429323	2.36128	1.71729	2.7906	1.60996	2.46861	2.89793	2.36128	2.57594	1.50263	2.36128	3.21992	2.1246	1.80591	2.33706	1.28797	1.93195	0.321992	0.965976	3.54191	3.11259		3.02067	0.97093		U2O3	2.97223	1.08982	1.32099	3.16048	1.63473	0.435928	3.37844	1.54116	0.990745	0.660497	1.85269	2.07066	1.42392	4.60036
sum tr.	2761.33	2564.8	2914.9	2976.36	2966.09	3042.38	2867.03	3517.31	2826.79	2611.86	2739.45	2554.01	2854.78	3273.11	3239.67	3678.24	1970.77	1863.19	1965.61	1930.88	1888.26	1671.04	1351.36	1648.15	2170.13	2463.88	2132.78	2762.79	1757.8	1515.97		2564.8	2564.99		sum tr.	4977.51	5050.21	3039.87	4883.1	3931.35	3643.59	2804.35	2294.8	2113.19	2091.49	2590.39	2417.75	2410.38	3845.62
in %	0.276133	0.25648	0.29149	0.297636	0.296609	0.304238	0.286703	0.351731	0.282679	0.261186	0.273945	0.255401	0.285478	0.327311	0.323967	0.367824	0.197077	0.186319	0.196561	0.193088	0.188826	0.167104	0.135136	0.164815	0.217013	0.246388	0.213278	0.276279	0.17578	0.151597		0.25648	0.256499		in %	0.497751	0.505021	0.303987	0.48831	0.393135	0.364359	0.280435	0.22948	0.211319	0.209149	0.259039	0.241775	0.241038	0.384562
ICPMS
	SR 08-1	SR 08-2	SR 08-3	SR 08-4	SR 08-5	SR 08-6	SR 09-1	SR 09-2	SR 09-4	SR 09-5	SR 09-7	SR 10-1	SR 12-2	SR 12-4	SR 12-5	SR 12-6	SR 14-1	SR 14-2	SR 14-3	SR 14-4	SR 14-5	SR 15-4	SR 15-5	SR 15-6	SR 15-8	SR 17-1	SR 17-2	PEP	El Morro	Clast (El Morro)		SR 08-2	SR 08-2®			SL 08-1	SL 08-3	SL 08-4	SL 08-5	SL 08-7	SL 10-1	SL 10-3	SL 12-2	SL 12-3	SL 13-1	SL 13-4	SL 15-2	SL 16-4	Montado-02
La ppm	25.2137	20.157	11.2622	24.2278	22.5794	18.7419	18.907	22.7525	21.7125	18.3073	24.8199	17.8804	20.923	19.7172	29.9971	40.2465	12.1039	11.7908	9.94584	19.1587	14.8364	24.2401	17.9023	19.0181	15.2838	22.9118	12.9577	27.9333	21.2111	22.8706		20.157	19.8497			42.5788	44.7581	24.4398	40.3713	29.8648	24.7468	32.2355	10.5942	7.78211	9.12459	16.9583	14.1441	24.1363	21.9997
Ce ppm	51.0086	35.0247	25.6073	47.8505	45.0281	36.8356	37.7943	45.5107	43.2783	37.8016	49.9067	37.241	41.8669	39.392	57.5518	80.0404	26.1119	23.7208	23.9376	37.4983	32.7404	50.7902	37.4417	37.9416	33.5882	43.9089	29.9657	56.4807	32.513	45.8877		35.0247	34.867			91.0057	95.1123	48.795	85.6428	60.1365	49.6191	65.2603	20.2683	15.9707	18.379	33.7617	28.8704	46.5993	43.8488
Pr ppm	6.26856	5.07027	3.27971	6.26815	5.74723	4.80314	4.85021	5.76078	5.55642	4.72165	6.11676	4.8079	5.27636	5.04955	6.9349	10.0517	3.56783	3.41048	3.37629	4.48038	4.33279	6.32542	4.64496	4.53985	4.66279	5.359	4.26847	6.93836	3.32653	5.56222		5.07027	4.97597			11.7046	12.3693	6.08273	10.9928	7.63986	6.2141	8.07198	2.7322	2.09337	2.45354	4.30286	3.7653	5.86376	5.37166
Nd ppm	24.2707	20.5892	13.5646	25.5399	23.1644	19.5072	19.7168	23.0883	22.4994	19.2123	23.7079	19.4989	21.0263	20.4796	26.4803	40.5029	15.6509	14.602	15.1018	16.8106	18.2696	24.3303	17.8933	16.9149	20.4208	20.4158	19.2761	26.95	10.8402	21.6175		20.5892	20.4762			44.8041	47.3793	23.578	41.9097	29.5792	23.4425	31.4377	11.5967	9.16215	10.4418	17.5472	15.3256	22.7338	19.975
Sm ppm	5.03554	4.54697	3.16759	5.50933	4.91897	4.21824	4.33752	4.95805	4.82564	4.0936	4.88113	4.30659	4.44849	4.35467	5.48623	8.60374	3.9727	3.52704	3.74537	3.50496	4.50355	5.58555	3.99456	3.50169	5.15622	4.09291	4.82085	5.42474	1.964	4.82348		4.54697	4.40016			7.16499	7.60823	4.46012	6.69481	5.14702	4.1726	6.41774	2.74676	2.22465	2.59009	3.54994	3.38615	4.62402	4.22368
Eu ppm	1.30187	1.404	1.14563	1.609	1.45994	1.30626	1.29506	1.50697	1.4693	1.24784	1.28263	1.31938	1.52018	1.33609	1.54177	2.51482	1.31144	1.17494	1.34864	0.840719	1.42142	0.951267	0.55293	0.664577	1.70511	1.11519	1.72466	1.4523	0.548433	0.817833		1.404	1.40775			1.96011	2.0679	1.38225	1.83929	1.53797	1.21986	1.75588	0.94014	0.807634	0.913216	1.11881	1.13572	1.29605	0.784052
Gd ppm	4.21177	4.1609	2.7228	4.77596	4.31604	3.71936	3.72358	4.38798	4.30857	3.59922	4.16459	3.83469	3.85687	3.82504	4.71453	7.6202	4.13768	3.51587	3.9913	3.08298	4.63823	5.33739	3.90122	3.10801	5.48048	3.34482	5.10323	4.67681	1.6532	4.47502		4.1609	4.10719			4.51474	4.95462	3.58022	4.22834	3.69957	2.89427	5.45625	2.7759	2.10846	2.57414	2.9359	3.05537	3.94619	4.05578
Tb ppm	0.648244	0.635889	0.427326	0.710523	0.655622	0.564011	0.566601	0.679565	0.64912	0.53562	0.647146	0.579963	0.594912	0.582837	0.712079	1.15066	0.665372	0.572551	0.661189	0.512392	0.783374	0.968199	0.697404	0.517657	0.909445	0.520528	0.85905	0.717986	0.277829	0.792117		0.635889	0.643646			0.589537	0.649952	0.512252	0.522521	0.494086	0.389527	0.842707	0.426228	0.332231	0.417114	0.4331	0.467521	0.607595	0.736987
Dy ppm	3.86876	3.81167	2.53354	4.08885	3.85729	3.31202	3.33315	4.06136	3.86595	3.12827	3.82748	3.49916	3.47307	3.38467	4.22753	6.67807	3.95235	3.46384	4.09314	3.17222	4.92963	6.1675	4.39822	3.13069	5.59947	2.92743	5.27652	4.10228	1.78401	4.86071		3.81167	3.74665			2.88924	3.16138	2.761	2.6309	2.52169	2.02967	4.70084	2.53924	2.00016	2.36396	2.39452	2.73773	3.47507	4.64428
Ho ppm	0.742147	0.734405	0.493564	0.778896	0.756287	0.650151	0.650813	0.769253	0.750614	0.615076	0.743211	0.682547	0.687547	0.635173	0.830057	1.26411	0.810555	0.690262	0.846668	0.660967	1.02025	1.31874	0.940069	0.658095	1.14355	0.571627	1.07696	0.819498	0.378136	0.978681		0.734405	0.727278			0.526585	0.57438	0.511849	0.465495	0.45574	0.382896	0.933468	0.505946	0.39762	0.478191	0.460895	0.545854	0.68365	0.972411
Er ppm	1.97433	1.9014	1.27024	2.0617	2.01141	1.69362	1.67451	2.02498	1.9641	1.59831	1.98396	1.74176	1.78045	1.651	2.19328	3.25194	2.17451	1.82764	2.23805	1.83788	2.76168	3.81131	2.63347	1.74737	3.04099	1.49959	2.98852	2.11367	1.10057	2.72369		1.9014	1.91144			1.31805	1.41929	1.30992	1.17364	1.13744	0.970903	2.45827	1.33586	1.06798	1.2861	1.20706	1.44664	1.78202	2.74026
Tm ppm	0.28073	0.264617	0.183131	0.289989	0.284589	0.237471	0.237997	0.289097	0.278292	0.233435	0.282909	0.249486	0.25591	0.228649	0.316885	0.450638	0.307736	0.257069	0.319453	0.279336	0.393602	0.585543	0.409073	0.267129	0.438573	0.219767	0.439037	0.309997	0.180663	0.417938		0.264617	0.27518			0.180051	0.193009	0.17945	0.163779	0.154182	0.130658	0.343901	0.194236	0.148001	0.181316	0.167613	0.207917	0.256617	0.413963
Yb ppm	1.78099	1.64229	1.21439	1.79542	1.75138	1.5007	1.49804	1.82724	1.73953	1.42928	1.77447	1.57078	1.54764	1.43354	1.98634	2.80924	1.91541	1.56692	1.97654	1.88145	2.50431	3.81276	2.67322	1.71151	2.70215	1.36291	2.69924	1.8932	1.25743	2.65487		1.64229	1.66729			1.07643	1.16285	1.11992	0.995229	0.927002	0.8115	2.1756	1.19566	0.920057	1.13401	1.05101	1.32718	1.65517	2.62191
Lu ppm	0.274157	0.252721	0.185632	0.28048	0.270496	0.221357	0.227748	0.274595	0.266904	0.223248	0.276908	0.243307	0.236042	0.21626	0.309121	0.424477	0.294474	0.240258	0.301782	0.293807	0.390697	0.600576	0.418623	0.267586	0.421885	0.209568	0.419431	0.287792	0.207403	0.417578		0.252721	0.251849			0.164644	0.179778	0.178214	0.158547	0.146509	0.130489	0.3344	0.190015	0.150638	0.178228	0.170793	0.20374	0.254819	0.42263
Ba ppm	1001.14	204.347	399.811	800.463	816.131	732.531	758.418	819.244	811.421	763.869	925.879	551.691	742.817	761.592	998.062	969.827	404.852	389.867	130.753	799.379	423.052	729.456	445.399	366.465	428.568	823.632	299.016	887.996	706.996	785.246		204.347	205.028			1353.02	1365.38	684.021	1313.56	839.952	804.251	874.544	747.335	848.436	676.465	637.006	509.39	758.243	837.197
Th ppm	4.02395	1.71359	2.29986	2.57154	2.53241	2.37354	2.39983	2.24876	2.18635	2.5331	3.89158	2.38162	2.38581	2.50311	3.13759	3.14112	2.07732	1.95786	0.957411	6.50338	3.92829	9.18657	7.65656	4.54352	2.62425	3.36253	1.4688	4.3272	7.09498	7.19289		1.71359	1.72431			3.59548	3.60079	3.6985	3.75385	3.42612	1.97725	3.71379	1.88526	1.23258	1.6402	3.11017	2.17233	3.27044	8.1941
Nb ppm	8.71846	11.2348	14.5779	10.3924	9.1236	5.24782	5.31615	9.7014	9.71384	5.56318	8.51819	6.02503	5.30688	5.57821	12.5786	29.6861	5.50675	4.14793	3.71398	6.27211	6.39336	10.2632	8.3623	5.32963	6.0641	7.19235	6.92661	10.9445	6.47005	7.93208		11.2348	11.1043			10.8483	11.2388	5.52168	9.59645	5.79384	5.60906	15.1872	2.67065	2.56135	2.45239	3.6249	3.84507	8.32162	9.21237
Y ppm	19.3312	17.875	11.0627	20.3854	19.3578	16.5943	16.885	19.7355	18.9016	15.6525	19.753	16.9691	16.8391	16.4683	21.87	32.5093	20.5508	17.1393	20.7375	17.4316	25.4127	34.9034	24.4018	17.2538	28.7858	14.8414	27.3977	21.1442	10.2002	24.9991		17.875	17.9461			13.5995	14.6557	13.269	12.1575	11.6882	9.84502	24.2091	13.0891	10.1312	11.9933	11.9802	14.1027	17.9798	27.6664
Hf ppm	4.97245	3.43939	4.32714	4.13485	4.02577	3.37267	3.36528	3.97666	3.92884	3.52918	4.84595	3.72657	3.38032	3.50766	5.1464	6.43721	3.15645	2.80984	2.66432	4.4019	4.54232	7.2569	6.25634	4.92262	4.80121	4.52448	4.33904	5.32056	3.97991	5.88912		3.43939	3.41559			5.47597	5.72001	3.85381	4.94822	4.17304	3.15291	5.89457	2.60403	2.08003	2.41583	3.14573	2.86076	4.44891	5.22434
Ta ppm	0.626567	0.739058	0.950553	0.722403	0.646057	0.397334	0.399827	0.662818	0.665515	0.421851	0.594794	0.411869	0.393543	0.412509	0.850429	1.92552	0.442793	0.32834	0.268909	0.587793	0.518348	0.881494	0.756721	0.481073	0.464383	0.560291	0.464033	0.762359	0.621409	0.698458		0.739058	0.7343			0.603637	0.618958	0.358178	0.549901	0.338342	0.317443	1.01533	0.242344	0.222129	0.227225	0.278711	0.29804	0.621452	0.768252
U ppm	1.35085	2.00773	2.36382	0.857653	0.767847	0.839801	0.736997	0.609927	0.660875	0.535662	1.37963	0.782743	1.59	1.19738	1.66638	1.28997	0.723976	0.672	0.291871	1.99592	1.31013	2.83378	2.17227	2.13545	0.903393	1.26163	0.508888	1.4268	3.2898	2.80878		2.00773	2.01926			1.23981	1.23728	0.957448	1.08183	1.06607	0.644539	1.24994	0.715858	0.445399	0.660336	0.912522	0.674768	0.992405	2.8483
Pb ppm	10.0256	14.933	26.6536	7.6063	10.8781	13.306	9.20768	24.2555	6.91929	9.02457	9.87694	4.64789	7.98357	9.96617	10.0061	11.7492	3.96944	8.76526	7.40183	7.402	4.87575	5.33745	10.2982	7.61378	7.00658	8.05211	3.04632	11.8924	12.896	7.35646		14.933	15.1606			11.6458	11.7535	5.98686	10.348	7.81753	7.87249	9.50113	6.48337	5.74082	6.82322	7.84418	5.57617	8.00002	2.69243
Rb ppm	41.5861	13.8782	10.4113	28.9198	19.5799	27.0343	13.5917	9.65851	16.0527	26.6742	39.8682	24.2375	18.6902	28.995	36.4622	18.0383	21.5243	16.8708	4.31508	55.5261	33.1448	69.2408	42.8136	30.444	23.1387	45.0361	14.8348	44.3208	47.9721	50.2575		13.8782	14.1484			22.5712	25.9306	19.8261	22.9143	20.0391	12.4653	45.2355	30.2985	23.31	22.9767	24.4295	17.4026	37.9114	96.3649
Cs ppm	1.51398	1.64037	1.47993	0.984721	0.728722	0.90474	0.65322	0.787509	1.2106	0.707534	1.49083	0.719559	0.993495	1.32085	0.911542	1.20897	0.506725	0.308513	0.0670461	1.83179	0.471107	0.735199	1.4495	1.36655	0.423506	2.85942	1.99714	1.70961	2.80282	1.35636		1.64037	1.65666			0.3712	0.4091	0.394961	0.380656	0.258581	0.171856	1.43181	0.763699	0.472776	0.805412	0.734206	0.485421	0.991351	26.9363
Sr ppm	554.226	578.107	659.572	728.568	723.495	809.083	813.637	758.578	697.742	786.955	553.658	792.731	842.775	816.192	668.583	701.58	494.295	587.615	514.124	329.773	400.484	88.2091	134.164	226.338	457.126	497.018	399.879	569.291	226.791	84.3732		578.107	576.44			1973.09	1983.36	1134.49	2009.36	1622.85	1654.87	593.284	675.109	585.515	652.778	1024.73	882.155	598.88	1878.96
Sc ppm	14.4384	16.6804	18.5903	16.6128	16.7292	18.5078	18.1838	17.3793	17.9509	16.7124	14.844	21.3879	18.3222	18.4066	15.6901	18.7784	24.3069	19.1055	30.3887	7.80971	20.5971	4.17937	3.58756	2.25035	22.917	8.81813	27.1451	15.1632	3.41065	2.70999		16.6804	16.275			12.5246	12.826	12.5125	12.6092	14.1243	11.532	15.2259	12.6021	11.8436	13.3252	11.871	14.5279	13.0208	5.52973
Zr ppm	205.916	142.563	177.842	172.168	160.653	130.417	131.174	161.03	158.264	135.528	201.379	145.17	131.356	137.195	220.836	295.768	122.04	109.317	107.653	162.944	185.408	269.966	232.607	207.499	199.86	189.518	188.673	223.722	143.8	218.958		142.563	141.315			216.205	224.131	161.328	191.034	163.885	121.247	259.553	93.7636	72.4341	86.3909	124.981	111.608	183.3	182.79
[truncated: 6 more columns]

## Sheet: ICMPS
Raw whole rock trace elemental analyses ICPMS from the Washington State University GeoAnalytical Lab
Sample numbers reflect Year of collection, Month of collection, Day of collection, and order of collection
Sample ID	La ppm	Ce ppm	Pr ppm	Nd ppm	ppm	Eu ppm	Gd ppm	Tb ppm	Dy ppm	Ho ppm	Er ppm	Tm ppm	Yb ppm	Lu ppm	Ba ppm	Th ppm	Nb ppm	Y ppm	Hf ppm	Ta ppm	U ppm	Pb ppm	Rb ppm	Cs ppm	Sr ppm	Sc ppm	Zr ppm
U 15-01-08-1	25.2137	51.0086	6.26856	24.2707	5.03554	1.30187	4.21177	0.648244	3.86876	0.742147	1.97433	0.28073	1.78099	0.274157	1001.14	4.02395	8.71846	19.3312	4.97245	0.626567	1.35085	10.0256	41.5861	1.51398	554.226	14.4384	205.916
U 15-01-08-2	20.157	35.0247	5.07027	20.5892	4.54697	1.404	4.1609	0.635889	3.81167	0.734405	1.9014	0.264617	1.64229	0.252721	204.347	1.71359	11.2348	17.875	3.43939	0.739058	2.00773	14.933	13.8782	1.64037	578.107	16.6804	142.563
U 15-01-08-3	11.2622	25.6073	3.27971	13.5646	3.16759	1.14563	2.7228	0.427326	2.53354	0.493564	1.27024	0.183131	1.21439	0.185632	399.811	2.29986	14.5779	11.0627	4.32714	0.950553	2.36382	26.6536	10.4113	1.47993	659.572	18.5903	177.842
U 15-01-08-4	24.2278	47.8505	6.26815	25.5399	5.50933	1.609	4.77596	0.710523	4.08885	0.778896	2.0617	0.289989	1.79542	0.28048	800.463	2.57154	10.3924	20.3854	4.13485	0.722403	0.857653	7.6063	28.9198	0.984721	728.568	16.6128	172.168
U 15-01-08-5	22.5794	45.0281	5.74723	23.1644	4.91897	1.45994	4.31604	0.655622	3.85729	0.756287	2.01141	0.284589	1.75138	0.270496	816.131	2.53241	9.1236	19.3578	4.02577	0.646057	0.767847	10.8781	19.5799	0.728722	723.495	16.7292	160.653
U 15-01-08-6	18.7419	36.8356	4.80314	19.5072	4.21824	1.30626	3.71936	0.564011	3.31202	0.650151	1.69362	0.237471	1.5007	0.221357	732.531	2.37354	5.24782	16.5943	3.37267	0.397334	0.839801	13.306	27.0343	0.90474	809.083	18.5078	130.417
U 15-01-09-1	18.907	37.7943	4.85021	19.7168	4.33752	1.29506	3.72358	0.566601	3.33315	0.650813	1.67451	0.237997	1.49804	0.227748	758.418	2.39983	5.31615	16.885	3.36528	0.399827	0.736997	9.20768	13.5917	0.65322	813.637	18.1838	131.174
U 15-01-09-2	22.7525	45.5107	5.76078	23.0883	4.95805	1.50697	4.38798	0.679565	4.06136	0.769253	2.02498	0.289097	1.82724	0.274595	819.244	2.24876	9.7014	19.7355	3.97666	0.662818	0.609927	24.2555	9.65851	0.787509	758.578	17.3793	161.03
U 15-01-09-4	21.7125	43.2783	5.55642	22.4994	4.82564	1.4693	4.30857	0.64912	3.86595	0.750614	1.9641	0.278292	1.73953	0.266904	811.421	2.18635	9.71384	18.9016	3.92884	0.665515	0.660875	6.91929	16.0527	1.2106	697.742	17.9509	158.264
U 15-01-09-5	18.3073	37.8016	4.72165	19.2123	4.0936	1.24784	3.59922	0.53562	3.12827	0.615076	1.59831	0.233435	1.42928	0.223248	763.869	2.5331	5.56318	15.6525	3.52918	0.421851	0.535662	9.02457	26.6742	0.707534	786.955	16.7124	135.528
U 15-01-09-7	24.8199	49.9067	6.11676	23.7079	4.88113	1.28263	4.16459	0.647146	3.82748	0.743211	1.98396	0.282909	1.77447	0.276908	925.879	3.89158	8.51819	19.753	4.84595	0.594794	1.37963	9.87694	39.8682	1.49083	553.658	14.844	201.379
U 15-01-10-1	17.8804	37.241	4.8079	19.4989	4.30659	1.31938	3.83469	0.579963	3.49916	0.682547	1.74176	0.249486	1.57078	0.243307	551.691	2.38162	6.02503	16.9691	3.72657	0.411869	0.782743	4.64789	24.2375	0.719559	792.731	21.3879	145.17
U 15-01-12-2	20.923	41.8669	5.27636	21.0263	4.44849	1.52018	3.85687	0.594912	3.47307	0.687547	1.78045	0.25591	1.54764	0.236042	742.817	2.38581	5.30688	16.8391	3.38032	0.393543	1.59	7.98357	18.6902	0.993495	842.775	18.3222	131.356
U 15-01-12-4	19.7172	39.392	5.04955	20.4796	4.35467	1.33609	3.82504	0.582837	3.38467	0.635173	1.651	0.228649	1.43354	0.21626	761.592	2.50311	5.57821	16.4683	3.50766	0.412509	1.19738	9.96617	28.995	1.32085	816.192	18.4066	137.195
U 15-01-12-5	29.9971	57.5518	6.9349	26.4803	5.48623	1.54177	4.71453	0.712079	4.22753	0.830057	2.19328	0.316885	1.98634	0.309121	998.062	3.13759	12.5786	21.87	5.1464	0.850429	1.66638	10.0061	36.4622	0.911542	668.583	15.6901	220.836
U 15-01-12-6	40.2465	80.0404	10.0517	40.5029	8.60374	2.51482	7.6202	1.15066	6.67807	1.26411	3.25194	0.450638	2.80924	0.424477	969.827	3.14112	29.6861	32.5093	6.43721	1.92552	1.28997	11.7492	18.0383	1.20897	701.58	18.7784	295.768
U 15-01-14-1	12.1039	26.1119	3.56783	15.6509	3.9727	1.31144	4.13768	0.665372	3.95235	0.810555	2.17451	0.307736	1.91541	0.294474	404.852	2.07732	5.50675	20.5508	3.15645	0.442793	0.723976	3.96944	21.5243	0.506725	494.295	24.3069	122.04
U 15-01-14-2	11.7908	23.7208	3.41048	14.602	3.52704	1.17494	3.51587	0.572551	3.46384	0.690262	1.82764	0.257069	1.56692	0.240258	389.867	1.95786	4.14793	17.1393	2.80984	0.32834	0.672	8.76526	16.8708	0.308513	587.615	19.1055	109.317
U 15-01-14-3	9.94584	23.9376	3.37629	15.1018	3.74537	1.34864	3.9913	0.661189	4.09314	0.846668	2.23805	0.319453	1.97654	0.301782	130.753	0.957411	3.71398	20.7375	2.66432	0.268909	0.291871	7.40183	4.31508	0.0670461	514.124	30.3887	107.653
U 15-01-14-4	19.1587	37.4983	4.48038	16.8106	3.50496	0.840719	3.08298	0.512392	3.17222	0.660967	1.83788	0.279336	1.88145	0.293807	799.379	6.50338	6.27211	17.4316	4.4019	0.587793	1.99592	7.402	55.5261	1.83179	329.773	7.80971	162.944
U 15-01-14-5	14.8364	32.7404	4.33279	18.2696	4.50355	1.42142	4.63823	0.783374	4.92963	1.02025	2.76168	0.393602	2.50431	0.390697	423.052	3.92829	6.39336	25.4127	4.54232	0.518348	1.31013	4.87575	33.1448	0.471107	400.484	20.5971	185.408
U 15-01-15-4	24.2401	50.7902	6.32542	24.3303	5.58555	0.951267	5.33739	0.968199	6.1675	1.31874	3.81131	0.585543	3.81276	0.600576	729.456	9.18657	10.2632	34.9034	7.2569	0.881494	2.83378	5.33745	69.2408	0.735199	88.2091	4.17937	269.966
U 15-01-15-5	17.9023	37.4417	4.64496	17.8933	3.99456	0.55293	3.90122	0.697404	4.39822	0.940069	2.63347	0.409073	2.67322	0.418623	445.399	7.65656	8.3623	24.4018	6.25634	0.756721	2.17227	10.2982	42.8136	1.4495	134.164	3.58756	232.607
U 15-01-15-6	19.0181	37.9416	4.53985	16.9149	3.50169	0.664577	3.10801	0.517657	3.13069	0.658095	1.74737	0.267129	1.71151	0.267586	366.465	4.54352	5.32963	17.2538	4.92262	0.481073	2.13545	7.61378	30.444	1.36655	226.338	2.25035	207.499
U 15-01-15-8	15.2838	33.5882	4.66279	20.4208	5.15622	1.70511	5.48048	0.909445	5.59947	1.14355	3.04099	0.438573	2.70215	0.421885	428.568	2.62425	6.0641	28.7858	4.80121	0.464383	0.903393	7.00658	23.1387	0.423506	457.126	22.917	199.86
U 15-01-17-1	22.9118	43.9089	5.359	20.4158	4.09291	1.11519	3.34482	0.520528	2.92743	0.571627	1.49959	0.219767	1.36291	0.209568	823.632	3.36253	7.19235	14.8414	4.52448	0.560291	1.26163	8.05211	45.0361	2.85942	497.018	8.81813	189.518
U 15-01-17-2	12.9577	29.9657	4.26847	19.2761	4.82085	1.72466	5.10323	0.85905	5.27652	1.07696	2.98852	0.439037	2.69924	0.419431	299.016	1.4688	6.92661	27.3977	4.33904	0.464033	0.508888	3.04632	14.8348	1.99714	399.879	27.1451	188.673
U PEP	27.9333	56.4807	6.93836	26.95	5.42474	1.4523	4.67681	0.717986	4.10228	0.819498	2.11367	0.309997	1.8932	0.287792	887.996	4.3272	10.9445	21.1442	5.32056	0.762359	1.4268	11.8924	44.3208	1.70961	569.291	15.1632	223.722
U El Morro	21.2111	32.513	3.32653	10.8402	1.964	0.548433	1.6532	0.277829	1.78401	0.378136	1.10057	0.180663	1.25743	0.207403	706.996	7.09498	6.47005	10.2002	3.97991	0.621409	3.2898	12.896	47.9721	2.80282	226.791	3.41065	143.8
U clast (El Morro)	22.8706	45.8877	5.56222	21.6175	4.82348	0.817833	4.47502	0.792117	4.86071	0.978681	2.72369	0.417938	2.65487	0.417578	785.246	7.19289	7.93208	24.9991	5.88912	0.698458	2.80878	7.35646	50.2575	1.35636	84.3732	2.70999	218.958
Sample ID	La ppm	Ce ppm	Pr ppm	Nd ppm	ppm	Eu ppm	Gd ppm	Tb ppm	Dy ppm	Ho ppm	Er ppm	Tm ppm	Yb ppm	Lu ppm	Ba ppm	Th ppm	Nb ppm	Y ppm	Hf ppm	Ta ppm	U ppm	Pb ppm	Rb ppm	Cs ppm	Sr ppm	Sc ppm	Zr ppm
16-01-08-1	42.5788	91.0057	11.7046	44.8041	7.16499	1.96011	4.51474	0.589537	2.88924	0.526585	1.31805	0.180051	1.07643	0.164644	1353.02	3.59548	10.8483	13.5995	5.47597	0.603637	1.23981	11.6458	22.5712	0.3712	1973.09	12.5246	216.205
16-01-08-3	44.7581	95.1123	12.3693	47.3793	7.60823	2.0679	4.95462	0.649952	3.16138	0.57438	1.41929	0.193009	1.16285	0.179778	1365.38	3.60079	11.2388	14.6557	5.72001	0.618958	1.23728	11.7535	25.9306	0.4091	1983.36	12.826	224.131
16-01-08-4	24.4398	48.795	6.08273	23.578	4.46012	1.38225	3.58022	0.512252	2.761	0.511849	1.30992	0.17945	1.11992	0.178214	684.021	3.6985	5.52168	13.269	3.85381	0.358178	0.957448	5.98686	19.8261	0.394961	1134.49	12.5125	161.328
16-01-08-5	40.3713	85.6428	10.9928	41.9097	6.69481	1.83929	4.22834	0.522521	2.6309	0.465495	1.17364	0.163779	0.995229	0.158547	1313.56	3.75385	9.59645	12.1575	4.94822	0.549901	1.08183	10.348	22.9143	0.380656	2009.36	12.6092	191.034
16-01-08-7	29.8648	60.1365	7.63986	29.5792	5.14702	1.53797	3.69957	0.494086	2.52169	0.45574	1.13744	0.154182	0.927002	0.146509	839.952	3.42612	5.79384	11.6882	4.17304	0.338342	1.06607	7.81753	20.0391	0.258581	1622.85	14.1243	163.885
16-01-10-1	24.7468	49.6191	6.2141	23.4425	4.1726	1.21986	2.89427	0.389527	2.02967	0.382896	0.970903	0.130658	0.8115	0.130489	804.251	1.97725	5.60906	9.84502	3.15291	0.317443	0.644539	7.87249	12.4653	0.171856	1654.87	11.532	121.247
16-01-10-3	32.2355	65.2603	8.07198	31.4377	6.41774	1.75588	5.45625	0.842707	4.70084	0.933468	2.45827	0.343901	2.1756	0.3344	874.544	3.71379	15.1872	24.2091	5.89457	1.01533	1.24994	9.50113	45.2355	1.43181	593.284	15.2259	259.553
16-01-12-2	10.5942	20.2683	2.7322	11.5967	2.74676	0.94014	2.7759	0.426228	2.53924	0.505946	1.33586	0.194236	1.19566	0.190015	747.335	1.88526	2.67065	13.0891	2.60403	0.242344	0.715858	6.48337	30.2985	0.763699	675.109	12.6021	93.7636
16-01-12-3	7.78211	15.9707	2.09337	9.16215	2.22465	0.807634	2.10846	0.332231	2.00016	0.39762	1.06798	0.148001	0.920057	0.150638	848.436	1.23258	2.56135	10.1312	2.08003	0.222129	0.445399	5.74082	23.31	0.472776	585.515	11.8436	72.4341
16-01-13-1	9.12459	18.379	2.45354	10.4418	2.59009	0.913216	2.57414	0.417114	2.36396	0.478191	1.2861	0.181316	1.13401	0.178228	676.465	1.6402	2.45239	11.9933	2.41583	0.227225	0.660336	6.82322	22.9767	0.805412	652.778	13.3252	86.3909
16-01-13-4	16.9583	33.7617	4.30286	17.5472	3.54994	1.11881	2.9359	0.4331	2.39452	0.460895	1.20706	0.167613	1.05101	0.170793	637.006	3.11017	3.6249	11.9802	3.14573	0.278711	0.912522	7.84418	24.4295	0.734206	1024.73	11.871	124.981
16-01-15-2	14.1441	28.8704	3.7653	15.3256	3.38615	1.13572	3.05537	0.467521	2.73773	0.545854	1.44664	0.207917	1.32718	0.20374	509.39	2.17233	3.84507	14.1027	2.86076	0.29804	0.674768	5.57617	17.4026	0.485421	882.155	14.5279	111.608
16-01-16-4	24.1363	46.5993	5.86376	22.7338	4.62402	1.29605	3.94619	0.607595	3.47507	0.68365	1.78202	0.256617	1.65517	0.254819	758.243	3.27044	8.32162	17.9798	4.44891	0.621452	0.992405	8.00002	37.9114	0.991351	598.88	13.0208	183.3
Montado-02	21.9997	43.8488	5.37166	19.975	4.22368	0.784052	4.05578	0.736987	4.64428	0.972411	2.74026	0.413963	2.62191	0.42263	837.197	8.1941	9.21237	27.6664	5.22434	0.768252	2.8483	2.69243	96.3649	26.9363	1878.96	5.52973	182.79
Montado-07	22.9532	49.6028	6.20655	24.614	5.61051	1.39018	5.3561	0.937047	5.83982	1.23256	3.43734	0.519042	3.36127	0.540291	766.833	7.40501	9.34151	31.6731	7.63469	0.767542	2.11891	9.2258	66.7211	4.08634	165.527	5.92641	315.466
LS_08	15.0796	29.0638	3.56624	14.059	3.05719	0.904325	2.76287	0.446785	2.60781	0.508134	1.34591	0.203752	1.28744	0.208005	767.387	3.81974	4.01388	13.4185	3.18874	0.372282	1.12594	9.98454	38.1244	1.58846	570.786	9.92637	117.969
LS_10	14.3594	28.5307	3.45521	13.667	2.97972	0.915248	2.66602	0.424524	2.46228	0.482387	1.31249	0.185202	1.19211	0.198253	798.407	3.77425	4.0983	12.5997	3.14771	0.377151	1.20112	8.4717	41.2218	1.24508	574.888	10.1611	117.911
16-01-08-3 ®	45.3752	95.4697	12.466	48.0256	7.80491	2.06981	4.97631	0.628579	3.19991	0.584104	1.40527	0.188685	1.17035	0.179259	1377.76	3.64563	11.2226	14.846	5.7811	0.629531	1.24621	11.7053	26.2085	0.410193	2008.03	12.797	226.11
