# Supplementary material
Source: publisher figshare collection journal article supplement (https://gsapubs.figshare.com/ndownloader/files/23763530)
Supplement: Supplementary file 1 [file 23763530 › Supplemental Material 4.xlsx]

## Sheet: Sheet1
								correlation of concordia elipses (rho)						corrected age
analysis name	remarks	206Pb/238U	206Pb/238U	207Pb/235U	207Pb/235U	207Pb/206Pb	207Pb/206Pb		204Pb/206Pb	204Pb/206Pb	Th/U	U	% Radiogenic	206Pb/238U	206Pb/238U
			1 s.e.		1 s.e.		1 s.e.			1 s.e.	mass	ppm	206Pb		1 s.e
CB15=6@1.ais		0.00148	0.0000485	0.0183	0.000838	0.0897	0.00293	0.703	0.00490	0.000841	0.499	559	94.4	9	0.29
CB15=6@2.ais	antecryst	0.00490	0.000213	0.205	0.0151	0.303	0.0139	0.817	0.0186	0.00303	0.279	46.6	67.1	21.19	0.92
CB15=6@3.ais	antecryst	0.0299	0.00257	3.21	0.274	0.777	0.00474	0.998	0.0674	0.00817	0.692	31.3	6.54	12.63	1.08
CB15=6@4.ais		0.00171	0.000103	0.0444	0.00480	0.188	0.0122	0.854	0.0139	0.00345	0.331	75.3	81.9	9.02	0.54
CB15=6@5.ais	low 206Pb	0.0173	0.000574	1.85	0.0657	0.776	0.00766	0.961	0.0345	0.00201	0.383	230	6.78	7.45	0.25
CB15=6@6.ais		0.00146	0.0000670	0.0163	0.00134	0.0810	0.00552	0.562	0.00279	0.000663	0.620	475	95.6	8.99	0.41
CB15=6@7.ais		0.00171	0.0000648	0.0319	0.00296	0.135	0.00935	0.748	0.0155	0.00126	0.124	542	88.6	9.77	0.37
CB15=6@8.ais		0.00157	0.0000862	0.0314	0.00336	0.145	0.0109	0.752	0.0148	0.00227	0.214	204	87.4	8.84	0.48
CB15=6@9.ais		0.00144	0.0000615	0.0223	0.00167	0.112	0.00576	0.752	0.0129	0.00159	0.936	356	91.6	8.5	0.36
CB15=6@10.ais	large 207Pb/206Pb error	0.00179	0.0000994	0.0622	0.00865	0.252	0.0279	0.658	0.0169	0.00408	0.300	61.6	73.7	8.5	0.47
CB15=6@11.ais		0.00159	0.0000661	0.0295	0.00226	0.134	0.00785	0.656	0.00707	0.00114	0.668	514	88.7	9.09	0.38
CB15=6@12.ais		0.00252	0.000114	0.141	0.00678	0.404	0.00805	0.911	0.0173	0.00206	0.388	194	54.2	8.81	0.4
CB15=6@13.ais	low 206Pb	0.00871	0.000508	0.892	0.0560	0.742	0.0127	0.963	0.0394	0.00261	0.310	73.7	11.0	6.19	0.36
CB15=6@14.ais		0.00149	0.0000865	0.0176	0.00157	0.0859	0.00506	0.754	0.00449	0.000909	0.534	729	94.9	9.11	0.53
CB15=6@15.ais		0.00188	0.0000922	0.0585	0.00288	0.225	0.00333	0.955	0.0364	0.00252	0.719	615	77.1	9.34	0.46
all uncertainties 1σ excluding decay constant uncertainites
ratios uncorrected for common Pb
all ages relative to AS3 and FC1 (1099 Ma), external reproducibility of 206Pb/238U age = 3.9 % rel. (n = 40)
U concentrations relative to average of AS3 and FC1 with U = 370 ppm
Supplementary information #4 - U-Pb zircon data
