# Supplementary material
Source: publisher figshare collection journal article supplement (https://gsapubs.figshare.com/ndownloader/files/23763530)
Supplement: Supplementary file 1 [file 23763530 › Supplemental Material 5.xlsx]

## Sheet: Sheet1
Hf analysis name	U-Pb analysis name	(176Yb + 176Lu) / 176Hf (%)	Volts Hf	176Hf/177Hf	± (1s)	176Lu/177Hf	176Hf/177Hf (T)	eHf (0)	eHf (0) ± (1s)	eHf (T)	Age (Ma)	remarks
CB15_6_01	CB15=6@11.ais	55.5108	4.60241	0.283074	2.17285e-05	0.00331898	0.283074	10.2319	0.768374	10.4138	9.09
CB15_6_02	CB15=6@2.ais	61.8066	4.74749	0.283012	2.28708e-05	0.00307537	0.283011	8.0355	0.808769	8.46302	21.19	antecryst
CB15_6_03	CB15=6@3.ais	8.46023	5.37415	0.283086	1.73224e-05	0.000543823	0.283086	10.6517	0.612563	10.9276	12.63	antecryst
CB15_6_04	CB15=6@14.ais	39.5477	4.00337	0.283076	1.54427e-05	0.00243666	0.283076	10.3074	0.546093	10.4951	9.11
CB15_6_05	CB15=6@5.ais	53.5861	2.75207	0.283085	2.88535e-05	0.00328233	0.283084	10.6063	1.02033	10.7556	7.45	low 206Pb
CB15_6_06	CB15=6@4.ais	52.8078	4.74982	0.283062	1.93842e-05	0.00309638	0.283062	9.813	0.685476	9.99487	9.02
CB15_6_07	CB15=6@6.ais	10.2211	4.61547	0.283142	1.86778e-05	0.000645863	0.283141	12.6086	0.660496	12.8045	8.99
Supplementary information # 5 - zircon Hf isotopic data.
