# Supplementary material
Source: publisher figshare collection journal article supplement (https://gsapubs.figshare.com/ndownloader/files/23763530)
Supplement: Supplementary file 1 [file 23763530 › Supplemental Material 8.pdf]

Supplementary information # 8: Characteristic values for adakites, bajaites and high magnesian andesites relative to rocks from this study. The youngest rocks from this study display magnesian andesite characteristics, while older rocks all display calcalkaline trends. Oxides presented in weight percent, and trace elements in ppm.

|                                                                    | Literature Values                         |                                                 |                                                                | This Study                                  |                             |
|--------------------------------------------------------------------|-------------------------------------------|-------------------------------------------------|----------------------------------------------------------------|---------------------------------------------|-----------------------------|
|                                                                    | Adakite<br>(Moyen 2009;<br>Castillo 2012) | Bajaite <sup>1</sup><br>(Calmus et<br>al. 2003) | High-magnesian<br>andesite <sup>2</sup><br>(Conly et al. 2005) | High-<br>magnesian<br>andesite <sup>2</sup> | Calcalkaline <sup>1,2</sup> |
| SiO <sub>2</sub>                                                   | >56                                       | >50-58                                          | 47-60                                                          | 57-59                                       | 55-65                       |
| Al <sub>2</sub> O <sub>3</sub>                                     | >15                                       | 15-17                                           | 16-17                                                          | 16-18                                       | 16-20                       |
| MgO                                                                | <3                                        | 3.3-9.2                                         | 3.3-3.8                                                        | 3.5-4                                       | 1-5                         |
| Na <sub>2</sub> O                                                  | 3-7.5                                     | 4.2-4.5                                         | 4.3-4.6                                                        | 4.5-5                                       | 3-5                         |
| K <sub>2</sub> O                                                   | 2                                         | >2                                              |                                                                | 2-3.5                                       | 0.5-3                       |
| Sr                                                                 | 400-2000                                  | 1600-2000                                       | 1000-2000                                                      | 1600-2000                                   | 300-1200                    |
| Y                                                                  | ≤18                                       | 12.5-14                                         | 11-12                                                          | 10-15                                       | 11-30                       |
| Nb                                                                 | 2-11                                      | 6-12                                            | 4-16                                                           | 5-11                                        | 2-30                        |
| La                                                                 |                                           | 16-84                                           | 28-40                                                          | 25-40                                       | 8-40                        |
| Sr/Y                                                               | >20                                       | 119-142                                         | 100-165                                                        | 135-165                                     | 18-85                       |
| Ba                                                                 | <700                                      | <2300                                           | 626-1352                                                       | 800-1360                                    | 130-1000                    |
| Fe/Mg                                                              |                                           | <1.5                                            | 1.6-1.8                                                        | 1.5-1.6                                     | 1.5-3.0                     |
| La/Yb                                                              | >20                                       | 3-4                                             | 23-37                                                          | 32-40                                       | 5-21                        |
| Ce/Y                                                               |                                           | 5-7                                             |                                                                | 5-7                                         | 1-5                         |
| 1 Samples in the area of Santa Rosalía North near the Minera Boleo |                                           |                                                 |                                                                |                                             |                             |
| 2 Samples from Santa Rosalía South on Cerro San Lucas              |                                           |                                                 |                                                                |                                             |                             |
